# Supplementary material for: The Bu4NI-catalyzed alfa-acyloxylation of ketones with benzylic alcohols
Source: Royal Society of Chemistry journal article supplement (doi:10.1039/c4cc01652a), 2014-01-01

## Supporting Information

The  $\text{Bu}_4\text{NI}$ -catalyzed  $\alpha$ -acyloxylation of ketones with benzylic alcohols

Songjin Guo,<sup>†</sup> Jin-Tao Yu,<sup>†</sup> Qiang Dai,<sup>†</sup> Haitao Yang,<sup>†</sup> and Jiang Cheng<sup>\*,†,‡</sup>

*School of Petrochemical Engineering, Jiangsu Key Laboratory of Advanced Catalytic Materials & Technology, Jiangsu Province Key Laboratory of Fine Petrochemical Engineering, Changzhou University, Changzhou 213164, P. R. China, and State Key Laboratory of Coordination Chemistry, Nanjing University, Nanjing 210093, P. R. China*

Email: [jiangcheng@cczu.edu.cn](mailto:jiangcheng@cczu.edu.cn)

### Table of Contents

|                                                                                                |               |
|------------------------------------------------------------------------------------------------|---------------|
| <b>1. General Considerations</b>                                                               | <b>S2</b>     |
| <b>2. Experimental Procedures</b>                                                              | <b>S2</b>     |
| <b>3. The Reaction of Benzylic Alcohol in TBAI/TBHP</b>                                        | <b>S2</b>     |
| <b>4. Characterization Data for the Products</b>                                               | <b>S3-S6</b>  |
| <b>5. References</b>                                                                           | <b>S6</b>     |
| <b>6. Copies of the <math>^1\text{H}</math> NMR and <math>^{13}\text{C}</math> NMR Spectra</b> | <b>S7-S24</b> |

## 1. General Considerations

All chemicals were used as received without further purification unless stated otherwise.  $^1\text{H}$  NMR and  $^{13}\text{C}$  NMR spectra were recorded at ambient temperature on a 300 or 400 MHz NMR spectrometer (75 or 100 MHz for  $^{13}\text{C}$ ). NMR experiments are reported in  $\delta$  units, parts per million (ppm), and were referenced to  $\text{CDCl}_3$  ( $\delta$  7.26 or 77.0 ppm) as the internal standard. The coupling constants  $J$  are given in Hz. Column chromatography was performed using EM Silica gel 60 (300-400 mesh).

## 2. Experimental Procedures.

Under air, a 20 mL of Schlenk tube equipped with a stir bar was charged with benzylic alcohol **1** (0.2 mmol), Ketone (0.4 mmol),  $\text{Bu}_4\text{NI}$  (14.8 mg, 20 mol %), TBHP (70% aqueous, 162  $\mu\text{L}$ , 1.2 mmol), PhCN (2 mL). The tube was sealed with a Teflon lined cap. The reaction mixture was stirred at 90°C for 24h in oil bath. After the completion of the reaction (monitored by TLC), the solvent was concentrated in vacuum and the residue was purified by flash column chromatography on silica gel with petroleum ether-EtOAc as the eluent to give the desired product.

## 3. The Reaction of Benzylic Alcohol in TBAI/TBHP

Under air, a 20 mL of Schlenk tube equipped with a stir bar was charged with benzylic alcohol **1** (0.2 mmol),  $\text{Bu}_4\text{NI}$  (14.8 mg, 20 mol %), TBHP (70% aqueous, 162  $\mu\text{L}$ , 1.2 mmol), PhCN (2 mL). The tube was sealed with a Teflon lined cap. The reaction mixture was stirred at 40°C for 24 h in oil bath. After the completion of the reaction (monitored by TLC), the solvent was concentrated in vacuum and the residue was purified by flash column chromatography on silica gel with petroleum ether-EtOAc as the eluent to give benzoic acid (57% yield) and *tert*-butyl perester (28% yield).

#### 4. Characterization Data for the Products

**Oxo-1-phenylpropan-2-yl benzoate (3aa):**<sup>1</sup> 42.5 mg, 84% yield. White solid. <sup>1</sup>H NMR (CDCl<sub>3</sub>, 300 MHz) δ 1.68 (d, *J* = 6.9 Hz, 3H), 6.21 (q, *J* = 6.9 Hz, 1H), 7.42-7.51 (m, 4H), 7.55-7.62 (m, 2H), 7.99-8.03 (m, 2H), 8.08-8.12 (m, 2H); <sup>13</sup>C NMR (CDCl<sub>3</sub>, 75 MHz) δ 17.2, 71.8, 128.4, 128.5, 128.8, 129.4, 129.8, 133.3, 133.6, 134.4, 165.9, 196.7.

**1-Oxo-1-phenylpropan-2-yl 4-methoxybenzoate (3ba):** 45.3 mg, 80% yield. White solid. m.p.: 107–109 °C. <sup>1</sup>H NMR (CDCl<sub>3</sub>, 300 MHz) δ 1.65 (d, *J* = 6.9 Hz, 3H), 3.85 (s, 3H), 6.17 (q, *J* = 6.9 Hz, 1H), 6.90 (d, *J* = 9.0 Hz, 2H), 7.45-7.50 (m, 2H), 7.56-7.61 (m, 1H), 7.98-8.06 (m, 4H); <sup>13</sup>C NMR (CDCl<sub>3</sub>, 75 MHz) δ 17.1, 55.4, 71.5, 113.6, 121.8, 128.5, 128.7, 131.9, 133.5, 134.5, 163.6, 165.6, 197.0. MS(EI) 284 (M<sup>+</sup>); HRMS (ESI) *m/z* calcd. for C<sub>17</sub>H<sub>17</sub>O<sub>4</sub> (M+H)<sup>+</sup> 285.1121, found 285.1121.

**1-Oxo-1-phenylpropan-2-yl 4-chlorobenzoate (3ca):** 44.3 mg, 77% yield. White solid. m.p.: 102–104 °C. <sup>1</sup>H NMR (CDCl<sub>3</sub>, 300 MHz) δ 1.67 (d, *J* = 6.9 Hz, 3H), 6.20 (q, *J* = 6.9 Hz, 1H), 7.40-7.45 (m, 2H), 7.47-7.52 (m, 2H), 7.58-7.64 (m, 1H), 7.98-8.05 (m, 4H); <sup>13</sup>C NMR (CDCl<sub>3</sub>, 75 MHz) δ 17.2, 72.1, 127.9, 128.5, 128.8, 128.8, 131.3, 133.7, 134.3, 139.8, 165.1, 196.5. MS(ESI) 288 (M<sup>+</sup>); HRMS (EI) *m/z* calcd. for C<sub>16</sub>H<sub>14</sub>ClO<sub>3</sub> (M+H)<sup>+</sup> 289.0626, found 289.0619.

**1-Oxo-1-phenylpropan-2-yl 4-bromobenzoate (3da):** 47.3 mg, 71% yield. White solid. m.p.: 118–119 °C. <sup>1</sup>H NMR (CDCl<sub>3</sub>, 300 MHz) δ 1.66 (d, *J* = 7.2 Hz, 3H), 6.19 (q, *J* = 7.2 Hz, 1H), 7.46-7.51 (m, 2H), 7.57-7.62 (m, 3H), 7.94-8.00 (m, 4H); <sup>13</sup>C NMR (CDCl<sub>3</sub>, 75 MHz) δ 17.2, 72.1, 128.3, 128.3, 128.4, 128.8, 131.3, 131.7, 133.6, 134.2, 165.2, 196.4. MS(EI) 332 (M<sup>+</sup>); HRMS (ESI) *m/z* calcd. for C<sub>16</sub>H<sub>14</sub>BrO<sub>3</sub> (M+Na)<sup>+</sup> 354.9940, found 354.9933.

**1-Oxo-1-phenylpropan-2-yl 4-fluorobenzoate (3ea):** 44.0 mg, 81% yield. White solid. m.p.: 101–103 °C. <sup>1</sup>H NMR (CDCl<sub>3</sub>, 300 MHz) δ 1.66 (d, *J* = 6.9 Hz, 3H), 6.20 (q, *J* = 7.2 Hz, 1H), 7.07-7.15 (m, 2H), 7.44-7.51 (m, 2H), 7.56-7.62 (m, 1H), 7.98-8.01 (m, 2H), 8.08-8.14 (m, 2H); <sup>13</sup>C NMR (CDCl<sub>3</sub>, 75 MHz) δ 17.2, 71.9, 115.5 (d, *J*<sub>C-F</sub> = 21.9 Hz), 125.7 (d, *J*<sub>C-F</sub> = 2.9 Hz), 128.4, 128.8, 132.4 (d, *J*<sub>C-F</sub> = 9.4 Hz), 133.6, 134.3, 164.9, 165.9 (d, *J*<sub>C-F</sub> = 252.8 Hz), 196.5. MS(EI) 272 (M<sup>+</sup>); HRMS (ESI) *m/z*

calcd. for C<sub>16</sub>H<sub>14</sub>FO<sub>3</sub> (M+H)<sup>+</sup> 273.0921, found 273.0912.

**1-Oxo-1-phenylpropan-2-yl 4-nitrobenzoate (3fa):**<sup>2</sup> 38.8 mg, 65% yield. White solid. <sup>1</sup>H NMR (CDCl<sub>3</sub>, 300 MHz) δ 1.71 (d, *J* = 6.9 Hz, 3H), 6.25 (q, *J* = 6.9 Hz, 1H), 7.49-7.54 (m, 2H), 7.60-7.65 (m, 1H), 7.98-8.00 (m, 2H), 8.25-8.32 (m, 4H); <sup>13</sup>C NMR (CDCl<sub>3</sub>, 75 MHz) δ 17.3, 72.8, 123.5, 128.5, 128.9, 131.0, 133.9, 134.0, 134.9, 150.7, 164.1, 196.0.

**1-Oxo-1-phenylpropan-2-yl 4-(benzoyloxy)benzoate (3ga):** 46.0 mg, 61% yield. White solid. m.p.: 134–136 °C. <sup>1</sup>H NMR (CDCl<sub>3</sub>, 300 MHz) δ 1.69 (d, *J* = 6.9 Hz, 3H), 6.22 (q, *J* = 6.9 Hz, 1H), 7.30-7.35 (m, 2H), 7.47-7.55 (m, 4H), 7.58-7.69 (m, 2H), 8.00-8.02 (m, 2H), 8.16-8.22 (m, 4H); <sup>13</sup>C NMR (CDCl<sub>3</sub>, 75 MHz) δ 17.2, 72.0, 121.8, 127.0, 128.5, 128.6, 128.8, 129.0, 130.2, 131.5, 133.6, 133.9, 134.3, 154.9, 164.5, 165.2, 196.6. MS(EI) 374 (M<sup>+</sup>); HRMS (ESI) *m/z* calcd. for C<sub>23</sub>H<sub>19</sub>O<sub>5</sub> (M+H)<sup>+</sup> 375.1227, found 375.1230.

**1-Oxo-1-phenylpropan-2-yl 2-methylbenzoate (3ha):** 36.4 mg, 68% yield. White solid. m.p.: 51–52 °C. <sup>1</sup>H NMR (CDCl<sub>3</sub>, 300 MHz) δ 1.66 (d, *J* = 7.2 Hz, 3H), 2.59 (s, 3H), 6.20 (q, *J* = 6.9 Hz, 1H), 7.23-7.28 (m, 2H), 7.38-7.62 (m, 4H), 8.00-8.02 (m, 3H); <sup>13</sup>C NMR (CDCl<sub>3</sub>, 75 MHz) δ 17.1, 21.6, 71.7, 125.7, 128.4, 128.8, 128.9, 130.8, 131.6, 132.2, 133.5, 134.4, 140.5, 166.9, 196.9. MS(EI) 268 (M<sup>+</sup>); HRMS (ESI) *m/z* calcd. for C<sub>17</sub>H<sub>17</sub>O<sub>3</sub> (M+H)<sup>+</sup> 269.1172, found 269.1165.

**Oxo-1-phenylpropan-2-yl 1-naphthoate (3ia):** 53.7 mg, 88% yield. White solid. m.p.: 96–98 °C. <sup>1</sup>H NMR (CDCl<sub>3</sub>, 300 MHz) δ 1.73 (d, *J* = 7.2 Hz, 3H), 6.33 (q, *J* = 7.2 Hz, 1H), 7.49-7.56 (m, 4H), 7.58-7.65 (m, 2H), 7.82-7.90 (m, 1H), 8.03-8.08 (m, 3H), 8.32 (d, *J* = 7.2 Hz, 1H), 8.92 (d, *J* = 8.4 Hz, 1H); <sup>13</sup>C NMR (CDCl<sub>3</sub>, 75 MHz) δ 17.2, 71.9, 124.5, 125.7, 126.2, 126.3, 127.8, 128.5, 128.5, 128.8, 130.6, 131.3, 133.6, 133.6, 133.7, 134.4, 166.9, 196.9. MS(EI) 304 (M<sup>+</sup>); HRMS (ESI) *m/z* calcd. for C<sub>20</sub>H<sub>17</sub>O<sub>3</sub> (M+H)<sup>+</sup> 305.1172, found 305.1174.

**1-Oxo-1-phenylpropan-2-yl picolinate (3ja):** 28.2 mg, 55% yield. White solid. m.p.: 90–92 °C. <sup>1</sup>H NMR (CDCl<sub>3</sub>, 300 MHz) δ 1.71 (d, *J* = 7.2 Hz, 3H), 6.25 (q, *J* = 7.2 Hz, 1H), 7.44-7.49 (m, 3H), 7.54-7.60 (m, 1H), 7.82 (t, *J* = 7.7 Hz, 1H), 7.97-8.00 (m, 2H), 8.11-8.14 (m, 1H), 8.76-8.78 (m, 1H); <sup>13</sup>C NMR (CDCl<sub>3</sub>, 75 MHz) δ 17.2, 72.8,

125.4, 127.1, 128.4, 128.7, 133.6, 134.2, 136.9, 147.4, 150.0, 164.5, 196.1. MS(EI) 255 (M<sup>+</sup>); HRMS (ESI) *m/z* calcd. for C<sub>15</sub>H<sub>14</sub>NO<sub>3</sub> (M+H)<sup>+</sup> 256.0968, found 256.0966.

**1-Oxo-1-phenylpropan-2-yl isobutyrate (3ka):** 21.1 mg, 48% yield. Colorless oil. <sup>1</sup>H NMR (CDCl<sub>3</sub>, 300 MHz) δ 1.18-1.21 (m, 6H), 1.53 (q, *J* = 6.9 Hz, 3H), 2.65 (hept, *J* = 6.9 Hz, 1H), 5.95 (q, *J*=6.9 Hz, 1H), 7.45-7.50 (m, 2H), 7.56-7.61 (m, 1H), 7.91-7.95 (m, 2H); <sup>13</sup>C NMR (CDCl<sub>3</sub>, 75 MHz) δ 16.9, 18.8, 18.9, 33.7, 71.0, 128.4, 128.7, 133.5, 134.5, 176.6, 197.1. MS(EI) 220 (M<sup>+</sup>); HRMS (ESI) *m/z* calcd. for C<sub>13</sub>H<sub>17</sub>O<sub>3</sub> (M+H)<sup>+</sup> 221.1172, found 221.1168.

**1-Oxo-1-phenylpropan-2-yl cinnamate (3la):** 28.6 mg, 51% yield. White solid. m.p.: 67–68 °C. <sup>1</sup>H NMR (CDCl<sub>3</sub>, 300 MHz) δ 1.62 (d, *J* = 6.9 Hz, 3H), 6.12 (q, *J* = 7.2 Hz, 1H), 6.54 (d, *J* = 16.2 Hz, 1H), 7.38-7.41 (m, 3H), 7.47-7.63 (m, 5H), 7.72-7.78 (d, *J* = 16.2 Hz, 1H), 7.98-8.01 (m, 2H); <sup>13</sup>C NMR (CDCl<sub>3</sub>, 75 MHz) δ 17.2, 71.4, 117.1, 128.2, 128.5, 128.8, 128.9, 130.5, 133.6, 134.2, 134.4, 145.9, 166.2, 196.9. MS(EI) 280 (M<sup>+</sup>); HRMS (ESI) *m/z* calcd. for C<sub>18</sub>H<sub>16</sub>NaO<sub>3</sub> (M+Na)<sup>+</sup> 303.0992, found 303.0998.

**1-(4-Bromophenyl)-1-oxopropan-2-yl benzoate (3ab):**<sup>3</sup> 60.0 mg, 90% yield. White solid. <sup>1</sup>H NMR (CDCl<sub>3</sub>, 300 MHz) δ 1.66 (d, *J* = 7.2 Hz, 3H), 6.12 (q, *J* = 6.9 Hz, 1H), 7.42-7.48 (m, 2H), 7.56-7.65 (m, 3H), 7.85-7.89 (m, 2H), 8.06-8.10 (m, 2H); <sup>13</sup>C NMR (CDCl<sub>3</sub>, 75 MHz) δ 17.0, 71.7, 128.4, 128.8, 129.2, 129.8, 130.0, 132.1, 133.1, 133.4, 165.9, 195.8.

**1-Oxo-1-phenylpentan-2-yl 4-methoxybenzoate (3ac):** 45.0 mg, 72% yield. White solid. m.p.: 76–78 °C. <sup>1</sup>H NMR (CDCl<sub>3</sub>, 300 MHz) δ 0.97-1.02 (m, 3H), 1.52-1.68 (m, 2H), 1.93-2.01 (m, 2H), 3.86 (s, 3H), 6.06-6.10 (m, 1H), 6.91-6.95 (m, 2H), 7.46-7.51 (m, 2H), 7.56-7.62 (m, 1H), 7.99-8.08 (m, 4H); <sup>13</sup>C NMR (CDCl<sub>3</sub>, 75 MHz) δ 13.8, 19.0, 33.5, 55.4, 75.2, 113.6, 121.9, 128.4, 128.7, 131.9, 133.4, 134.9, 163.6, 165.9, 196.8. MS(EI) 312 (M<sup>+</sup>); HRMS (ESI) *m/z* calcd. for C<sub>19</sub>H<sub>20</sub>NaO<sub>4</sub> (M+Na)<sup>+</sup> 335.1254, found 335.1258.

**1-Oxo-1-(thiophen-2-yl)propan-2-yl 4-methoxybenzoate (3ad):** 38.7 mg, 67% yield. White solid. m.p.: 110–111 °C. <sup>1</sup>H NMR (CDCl<sub>3</sub>, 300 MHz) δ 1.69 (d, *J* = 7.2 Hz, 3H), 3.86 (s, 3H), 5.93 (q, *J* = 6.9 Hz, 1H), 6.93 (q, *J* = 8.7 Hz, 2H), 7.13-7.16 (m,

1H), 7.67-7.69 (m, 1H), 7.86-7.87 (m, 1H), 8.05 (d,  $J = 9.0$  Hz, 2H);  $^{13}\text{C}$  NMR ( $\text{CDCl}_3$ , 75 MHz)  $\delta$  17.7, 55.4, 72.6, 113.7, 121.7, 128.2, 132.0, 132.7, 134.4, 140.5, 163.7, 165.6, 189.9. MS(EI) 290 ( $\text{M}^+$ ); HRMS (ESI)  $m/z$  calcd. for  $\text{C}_{15}\text{H}_{15}\text{O}_4\text{S}$  ( $\text{M}+\text{H}$ ) $^+$  291.0686, found 291.0683.

**2-Oxocyclohexyl 4-methoxybenzoate (3ae):** 17.0 mg, 34% yield. White solid. m.p.: 138–140 °C.  $^1\text{H}$  NMR ( $\text{CDCl}_3$ , 300 MHz)  $\delta$  1.59-2.15 (m, 5H), 2.37-2.59 (m, 3H), 3.85 (s, 3H), 5.35-5.40 (m, 1H), 6.89-6.94 (m, 2H), 8.01-8.06 (m, 2H);  $^{13}\text{C}$  NMR ( $\text{CDCl}_3$ , 75 MHz)  $\delta$  23.7, 27.2, 33.2, 40.7, 55.4, 76.7, 113.5, 121.9, 131.9, 163.5, 165.2, 204.7. MS(EI) 248 ( $\text{M}^+$ ); HRMS (ESI)  $m/z$  calcd. for  $\text{C}_{14}\text{H}_{16}\text{NaO}_4$  ( $\text{M}+\text{Na}$ ) $^+$  271.0941, found 271.0946.

**(E)-4-Oxo-6-phenylhex-5-en-3-yl 4-methoxybenzoate (3af):** 30.3 mg, 47% yield. White solid. m.p.: 93–94 °C.  $^1\text{H}$  NMR ( $\text{CDCl}_3$ , 400 MHz)  $\delta$  1.10 (t,  $J = 7.6$  Hz, 3H), 1.94-2.08 (m, 2H), 3.87 (s, 3H), 5.40-5.43 (m, 1H), 6.92-6.96 (m, 3H), 7.36-7.39 (m, 3H), 7.54-7.56 (m, 2H), 7.76 (d,  $J = 16$  Hz, 1H), 8.08 (d,  $J = 8.8$  Hz, 2H);  $^{13}\text{C}$  NMR ( $\text{CDCl}_3$ , 100 MHz)  $\delta$  9.7, 24.4, 55.4, 79.1, 113.7, 121.0, 121.9, 128.5, 128.9, 130.8, 131.9, 134.3, 144.4, 163.7, 165.8, 196.2. MS(EI) 324 ( $\text{M}^+$ ); HRMS (ESI)  $m/z$  calcd. for  $\text{C}_{20}\text{H}_{21}\text{O}_4$  ( $\text{M}+\text{H}$ ) $^+$  325.1434, found 325.1429.

**1-Oxo-1-(pyridin-4-yl)propan-2-yl 4-methoxybenzoate (3ag):** 18.7 mg, 33% yield. Pale yellow solid. m.p.: 120–122 °C.  $^1\text{H}$  NMR ( $\text{CDCl}_3$ , 400 MHz)  $\delta$  1.62 (d,  $J = 6.8$  Hz, 3H), 3.86 (s, 3H), 6.03 (q,  $J = 7.2$  Hz, 1H), 6.92 (d,  $J = 8.8$  Hz, 2H), 7.76 (d,  $J = 6.0$  Hz, 2H), 8.00 (d,  $J = 8.8$  Hz, 2H), 8.82 (d,  $J = 5.6$  Hz, 2H);  $^{13}\text{C}$  NMR ( $\text{CDCl}_3$ , 100 MHz)  $\delta$  16.7, 55.5, 71.8, 113.8, 121.3, 121.3, 132.0, 140.8, 151.0, 163.8, 165.6, 197.0. MS(EI) 285 ( $\text{M}^+$ ); HRMS (ESI)  $m/z$  calcd. for  $\text{C}_{16}\text{H}_{15}\text{NNaO}_4$  ( $\text{M}+\text{Na}$ ) $^+$  308.0893, found 308.0890.

## 5. Reference

- [1] M. Shindo, Y. Yoshimura, M. Hayashi, H. Soejima, T. Yoshikawa, K. Matsumoto, and K. Shishido, *Org. Lett.*, 2007, **9**, 1963.
- [2] M. Uyanik, D. Suzuki, T. Yasui, and K. Ishihara, *Angew. Chem., Int. Ed.*, 2011, **50**, 5331..
- [3] C. S. Beshara, A. Hall, R. L. Jenkins, K. L. Jones, T. C. Jones, N. M. Killeen, P. H. Taylor, S. P. Thomas and N. C. O. Tomkinson, *Org. Lett.* 2005, **7**, 5729.

## 6. Copies of the $^1\text{H}$ NMR and $^{13}\text{C}$ NMR spectra

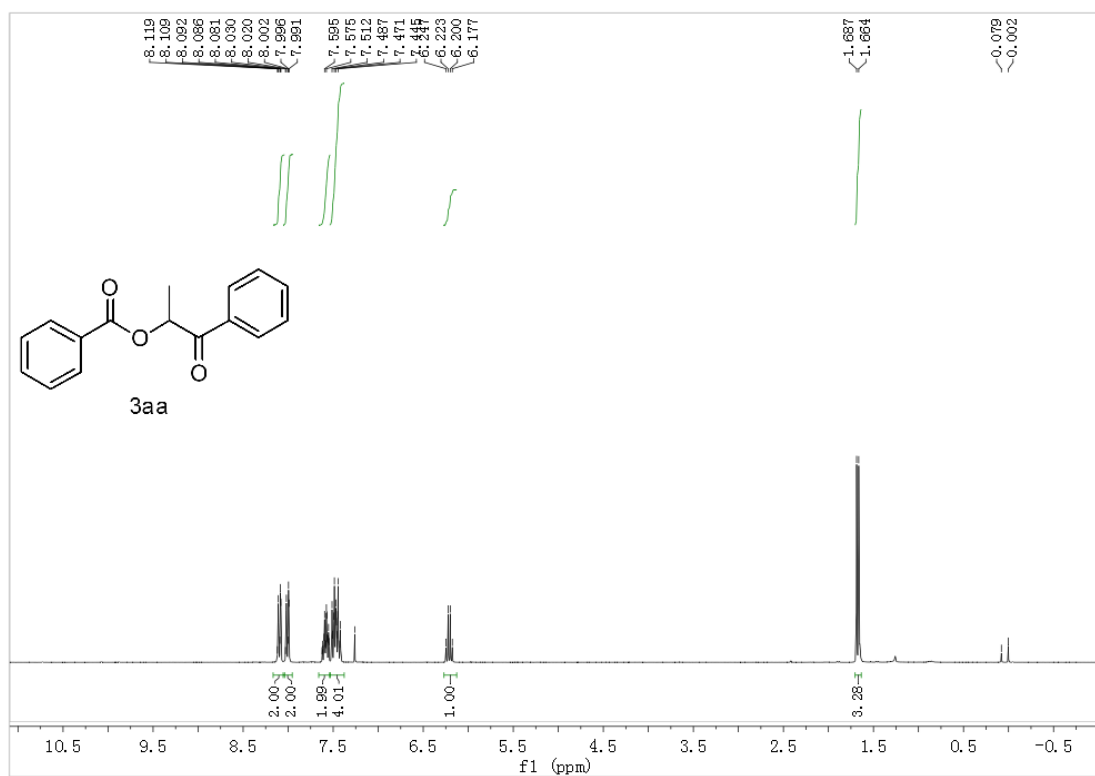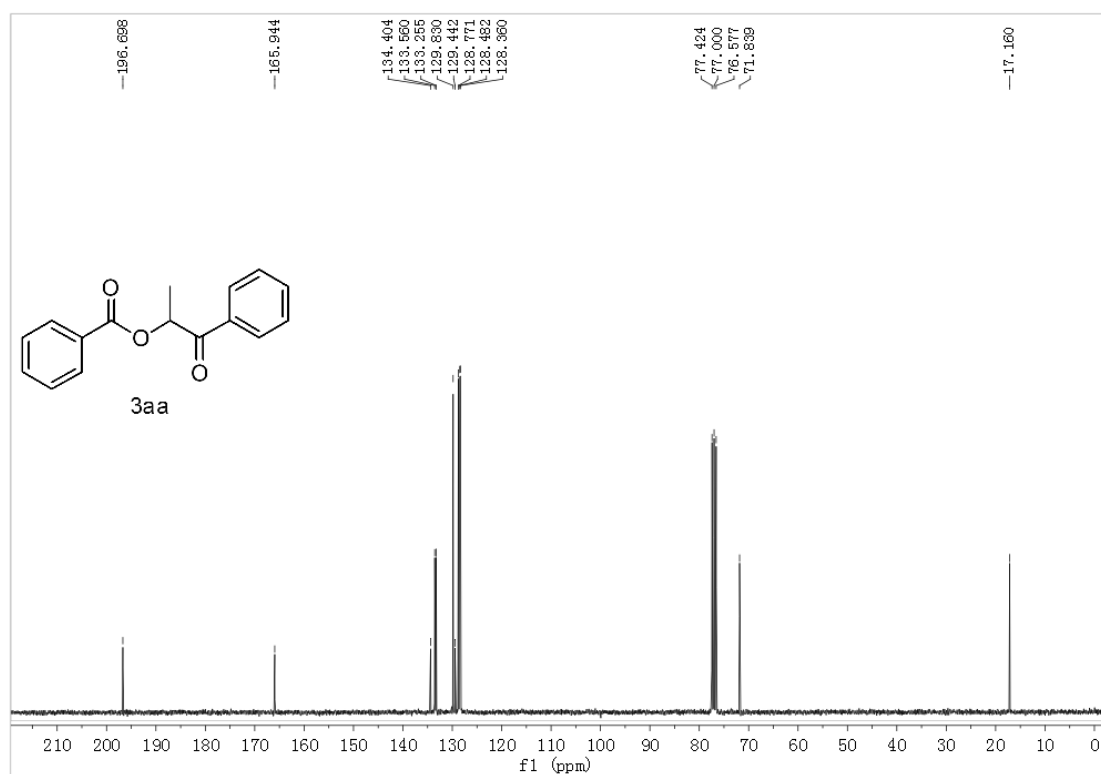

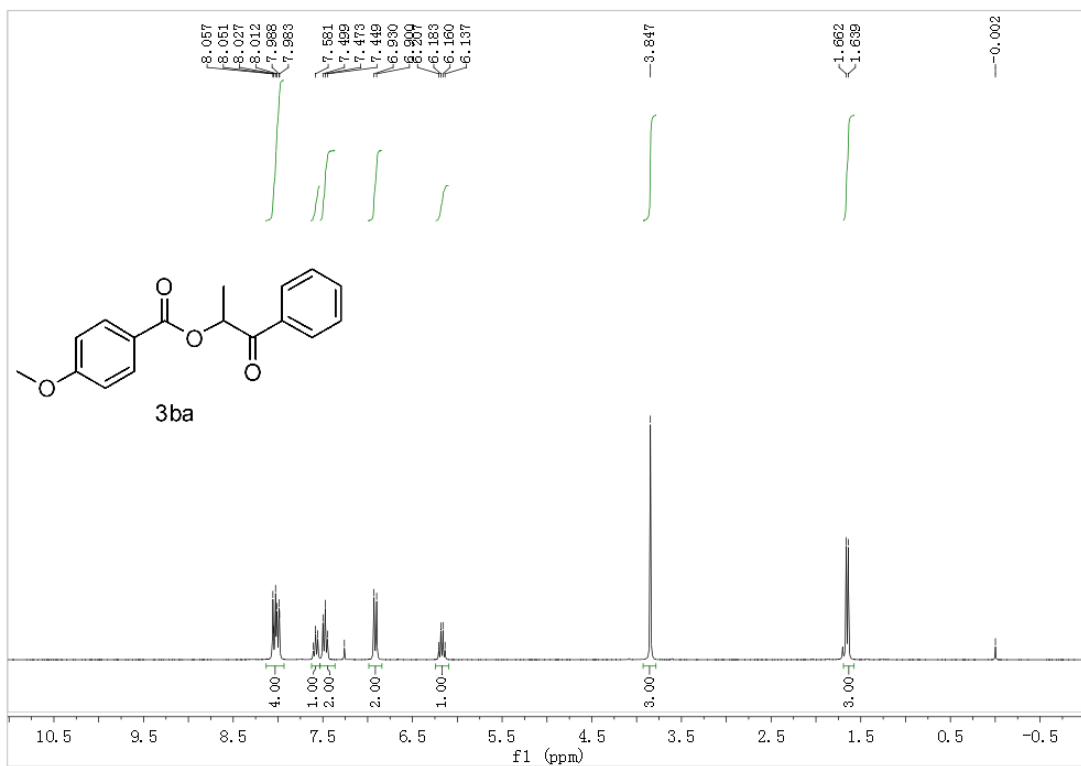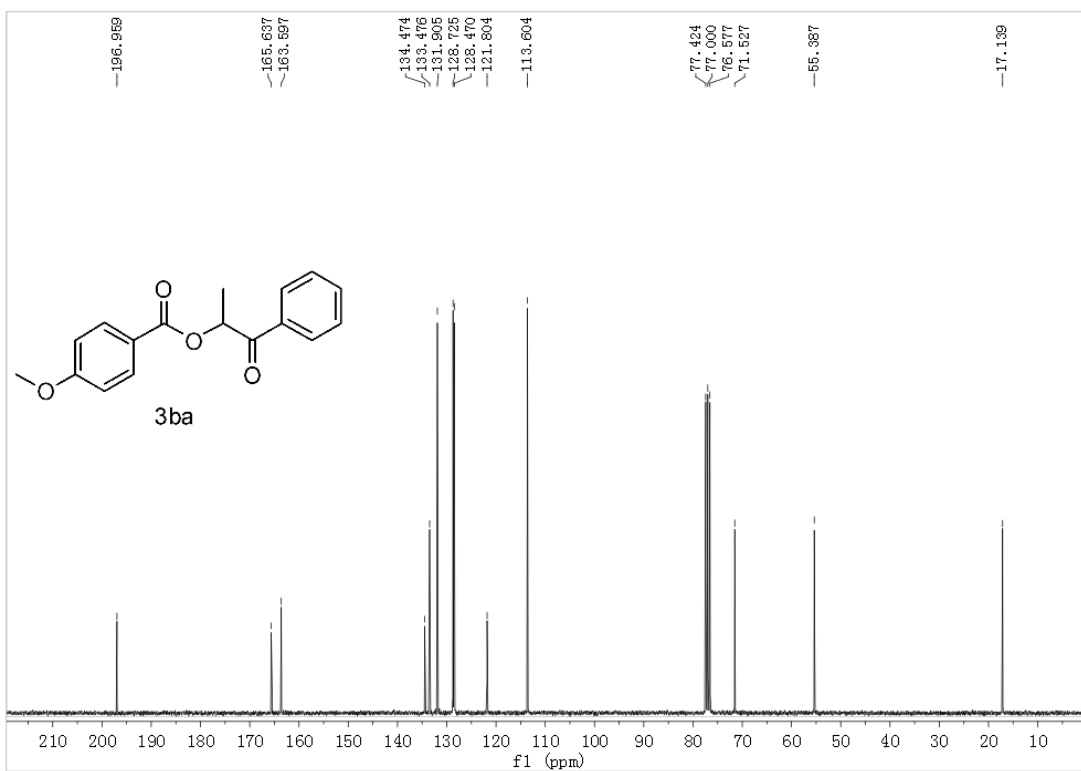



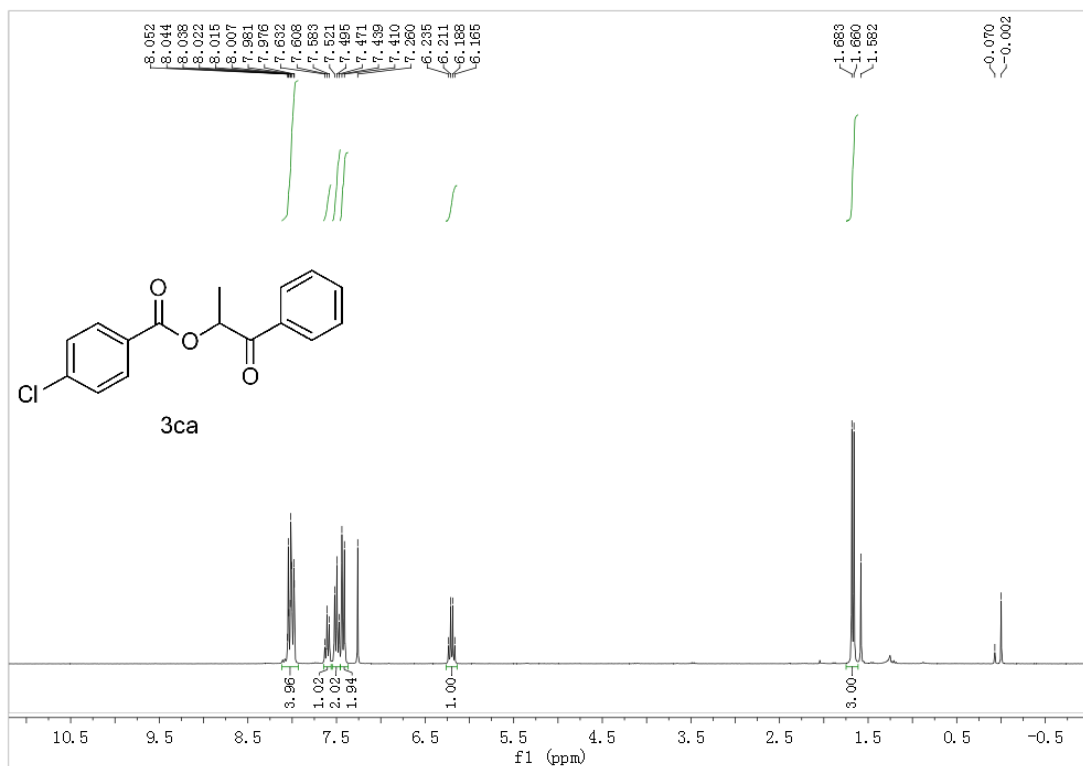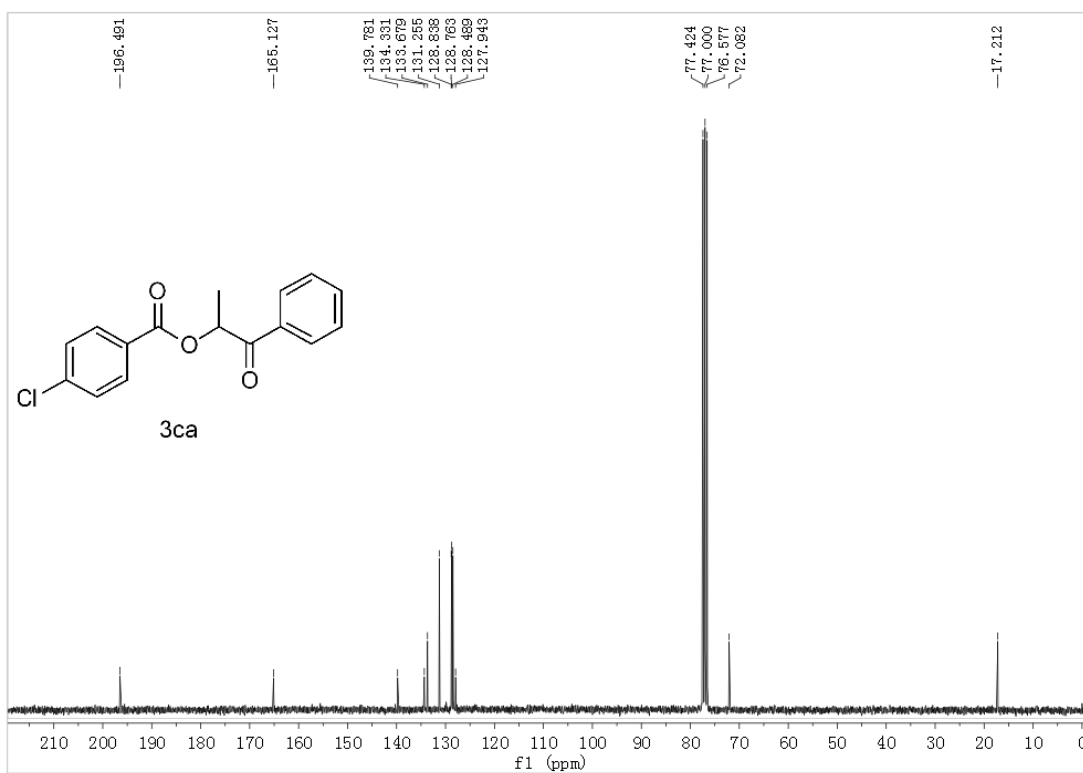

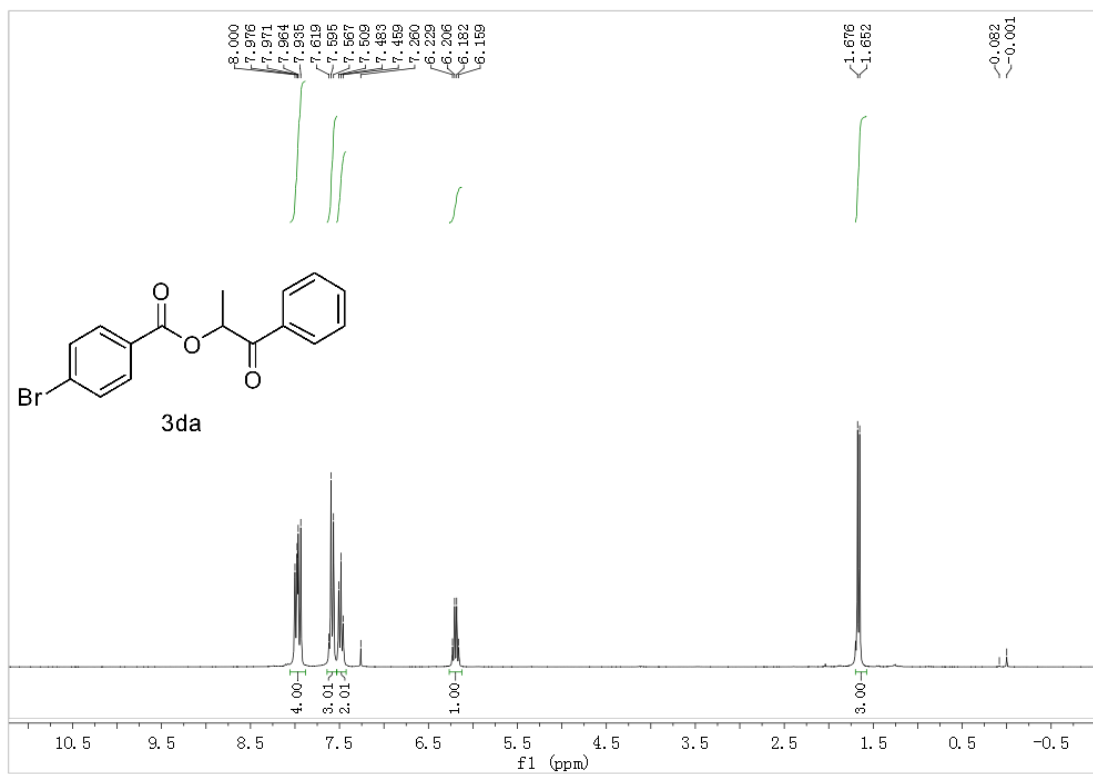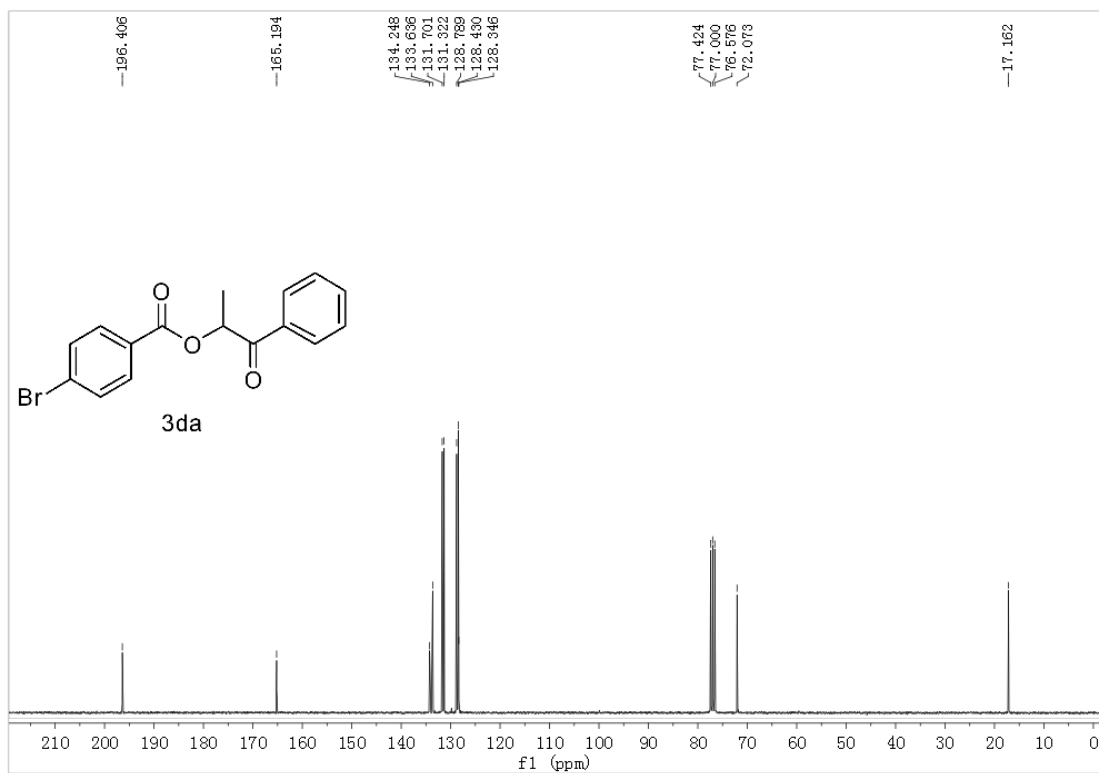

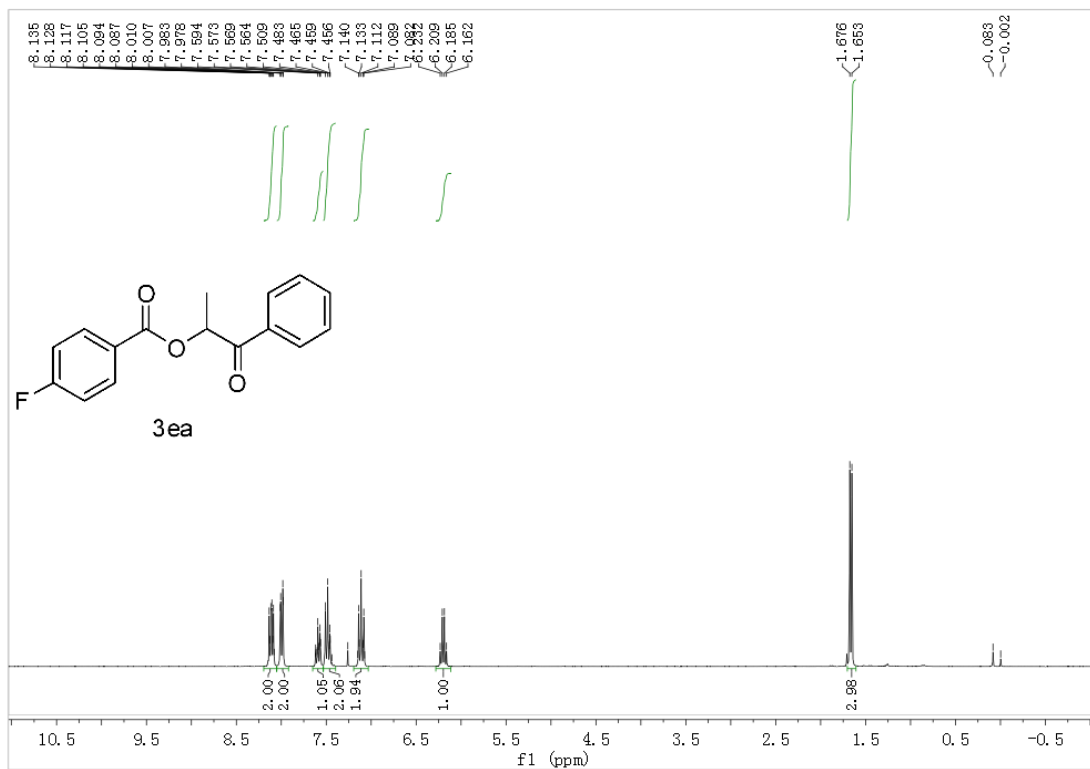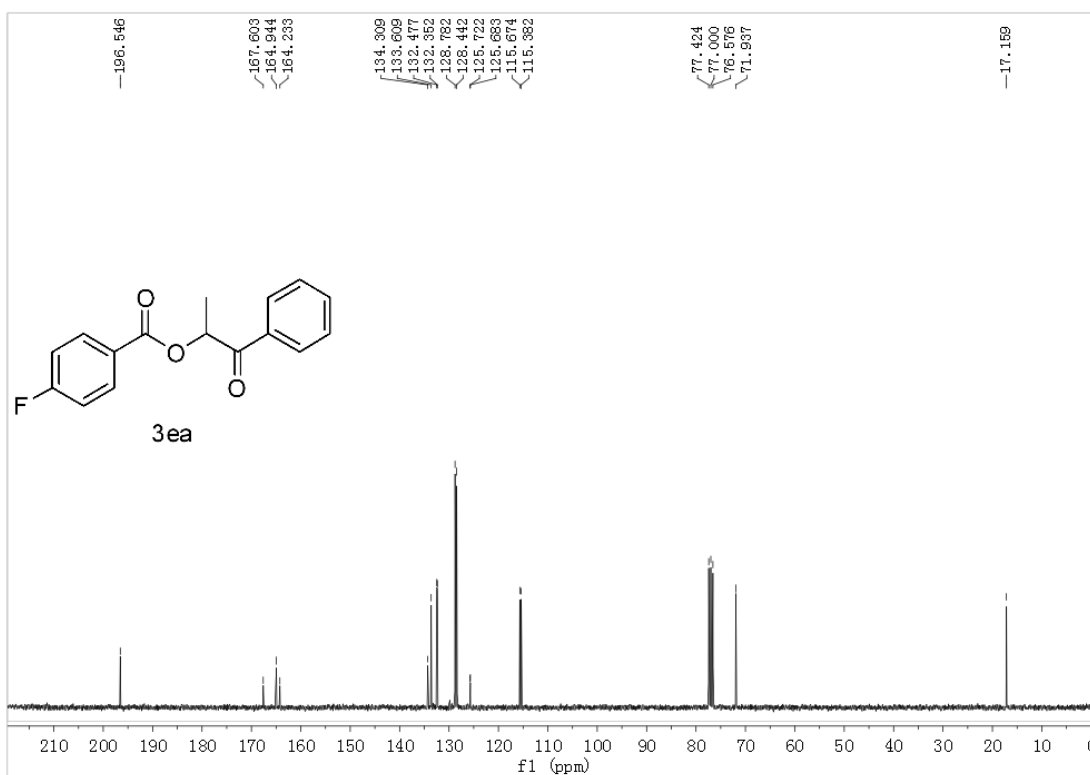

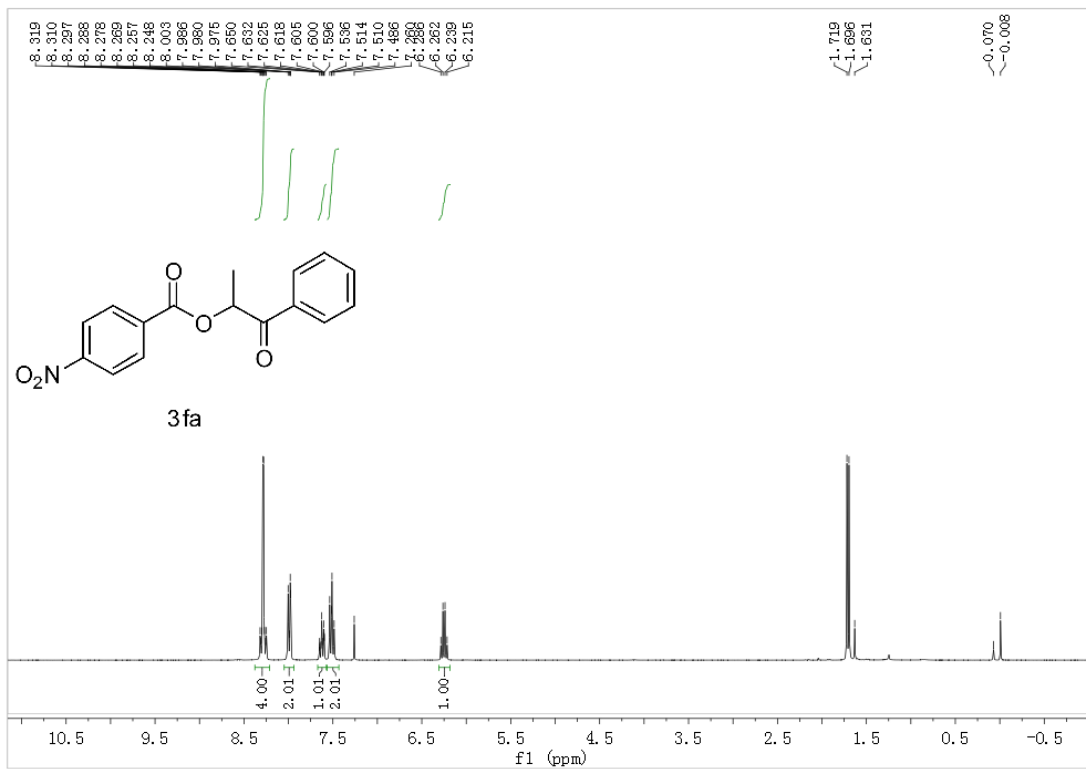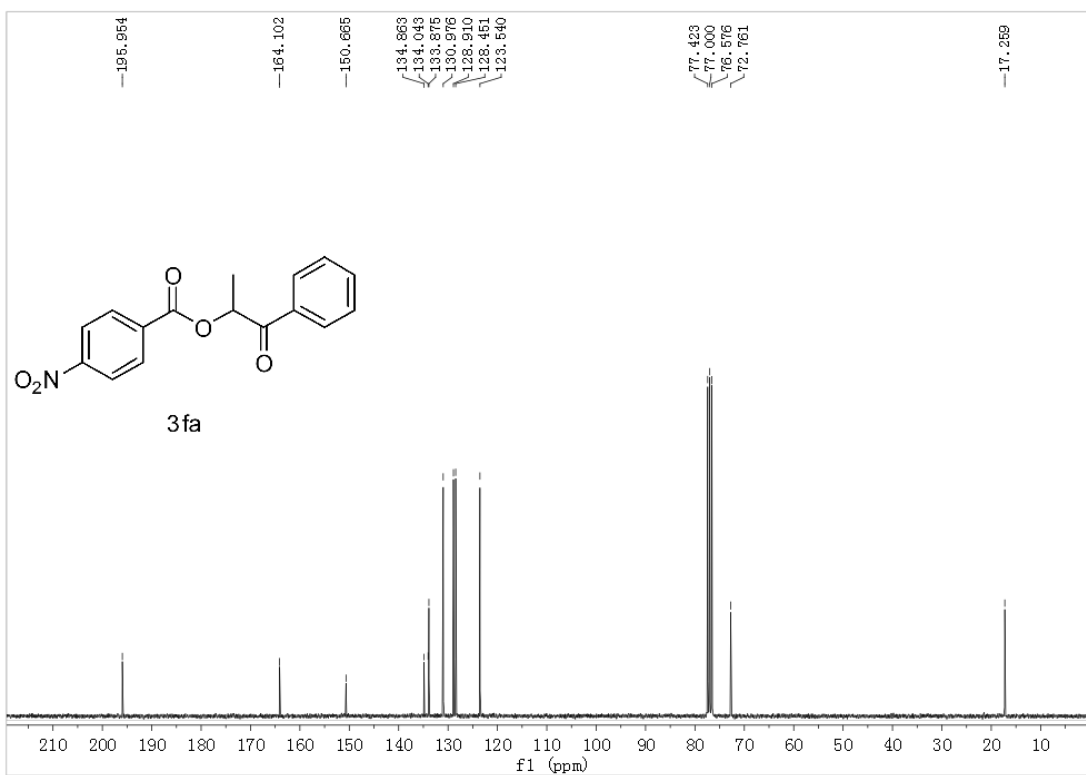

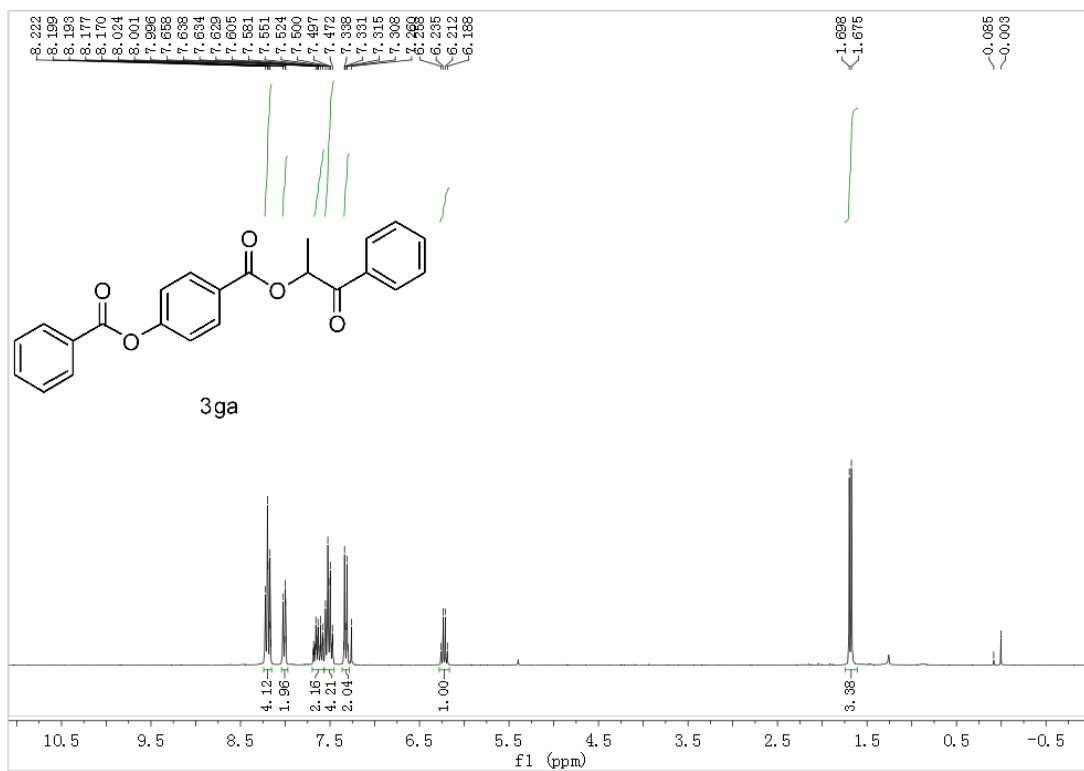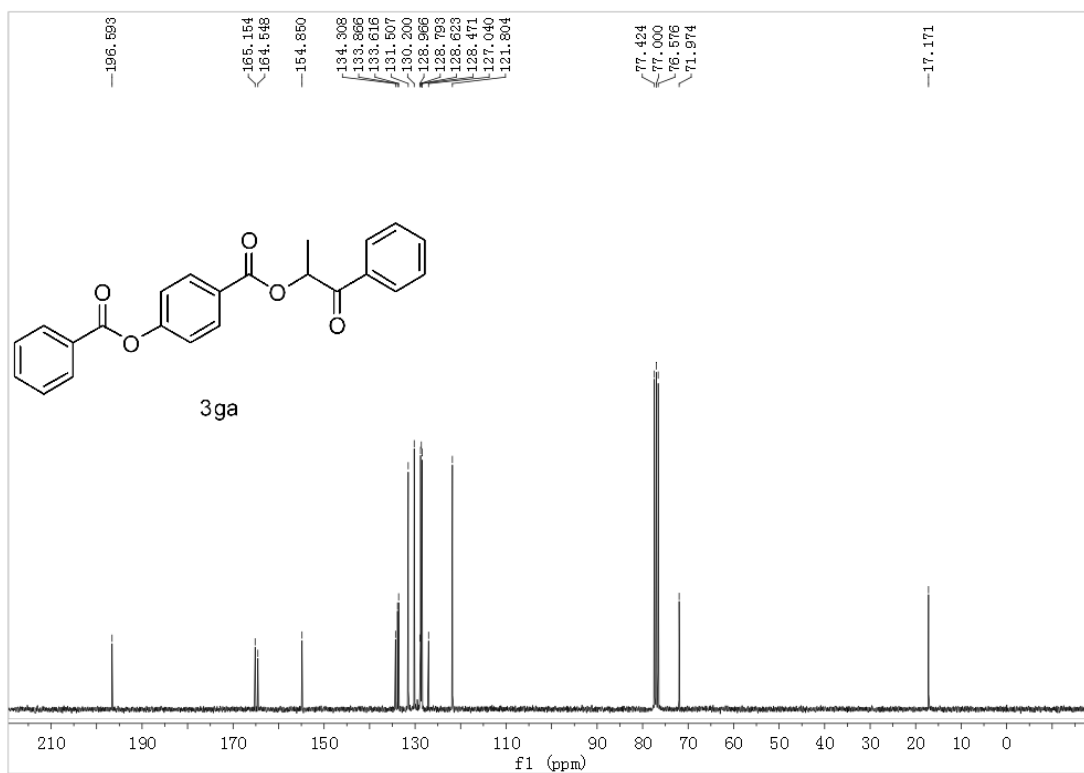

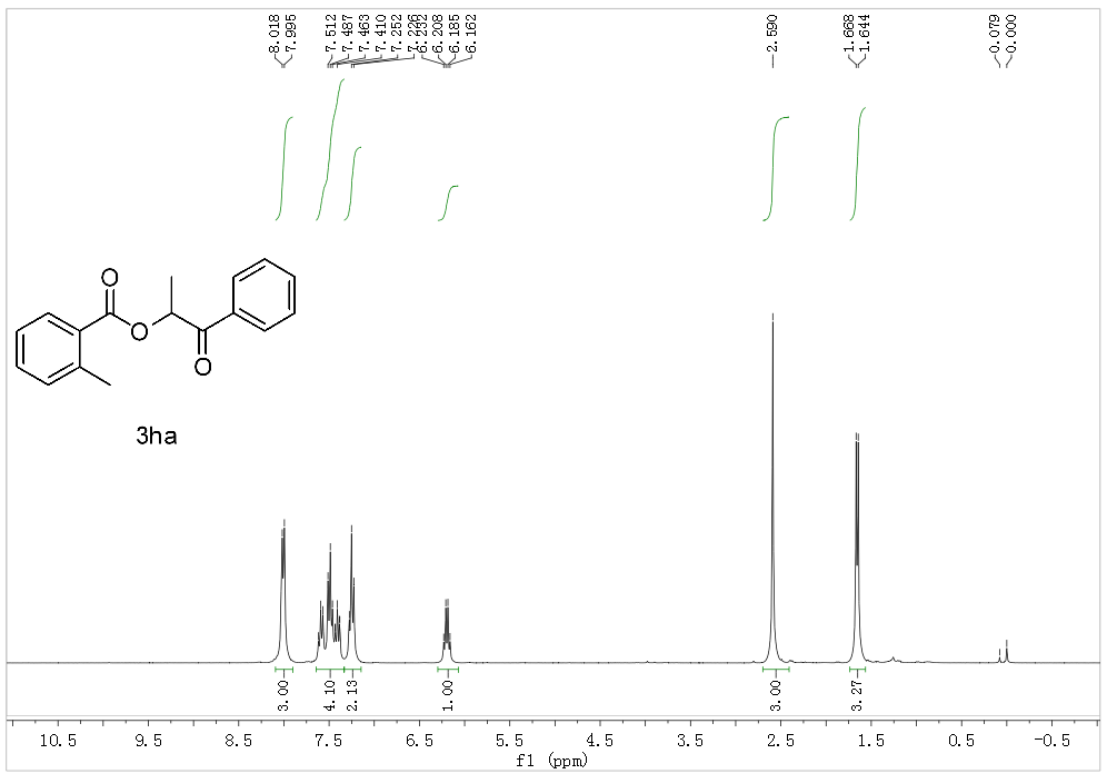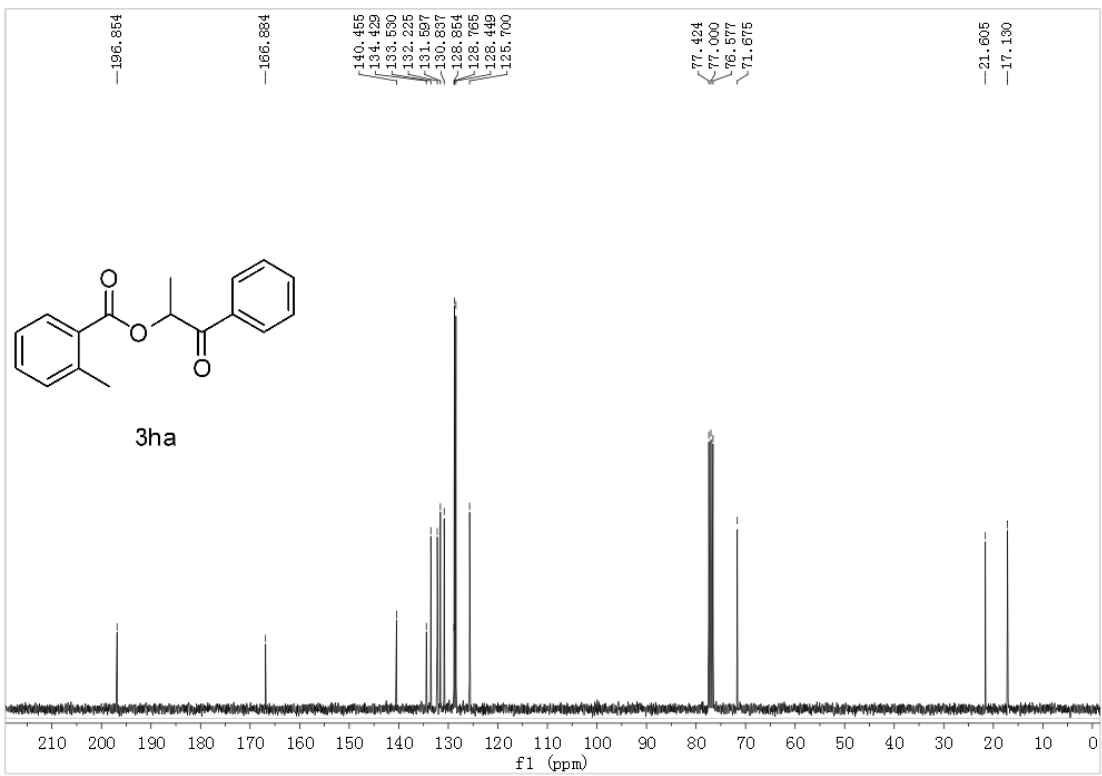

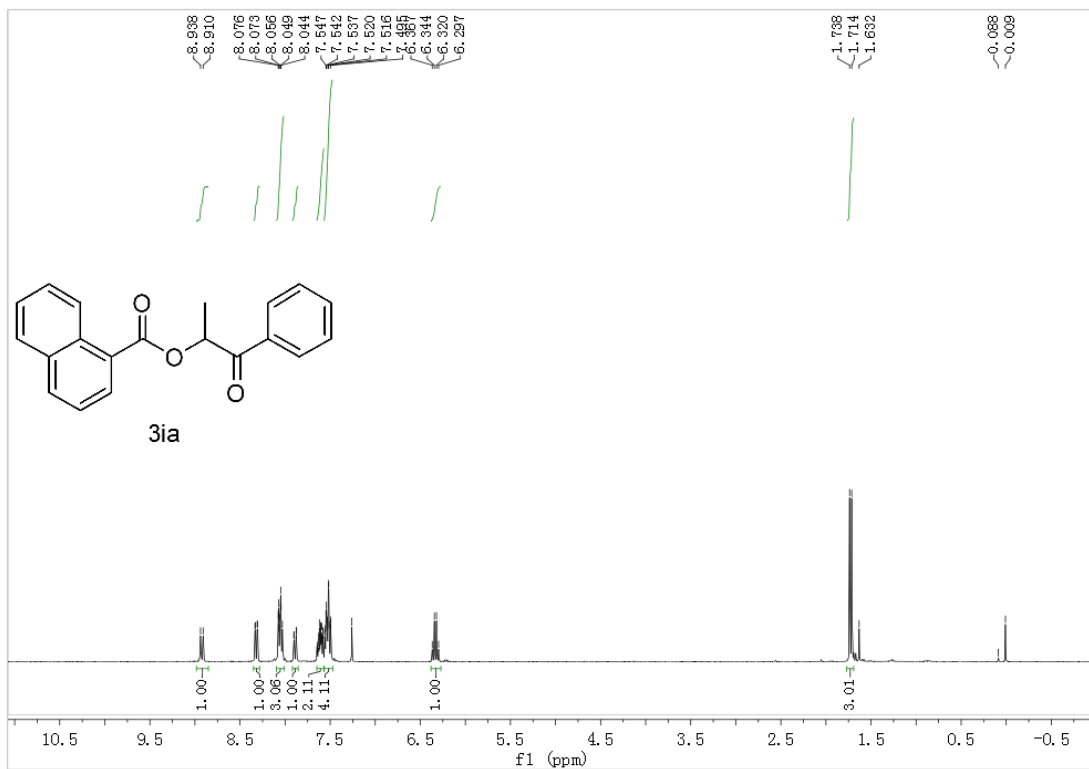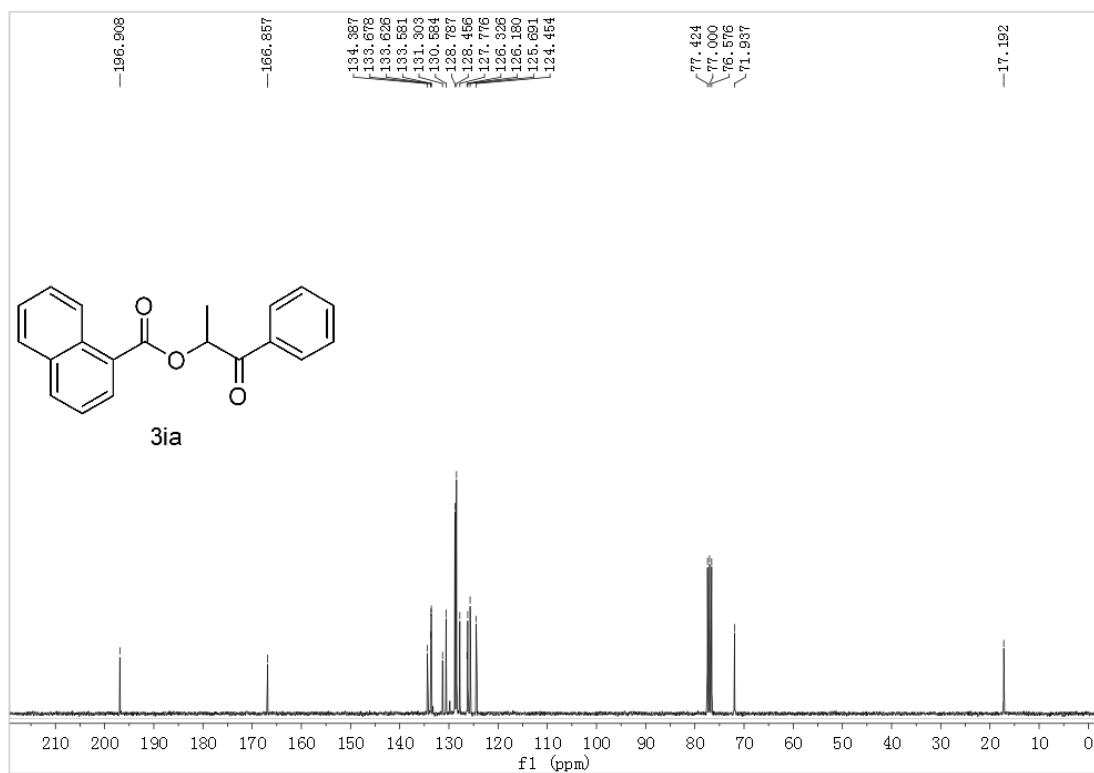

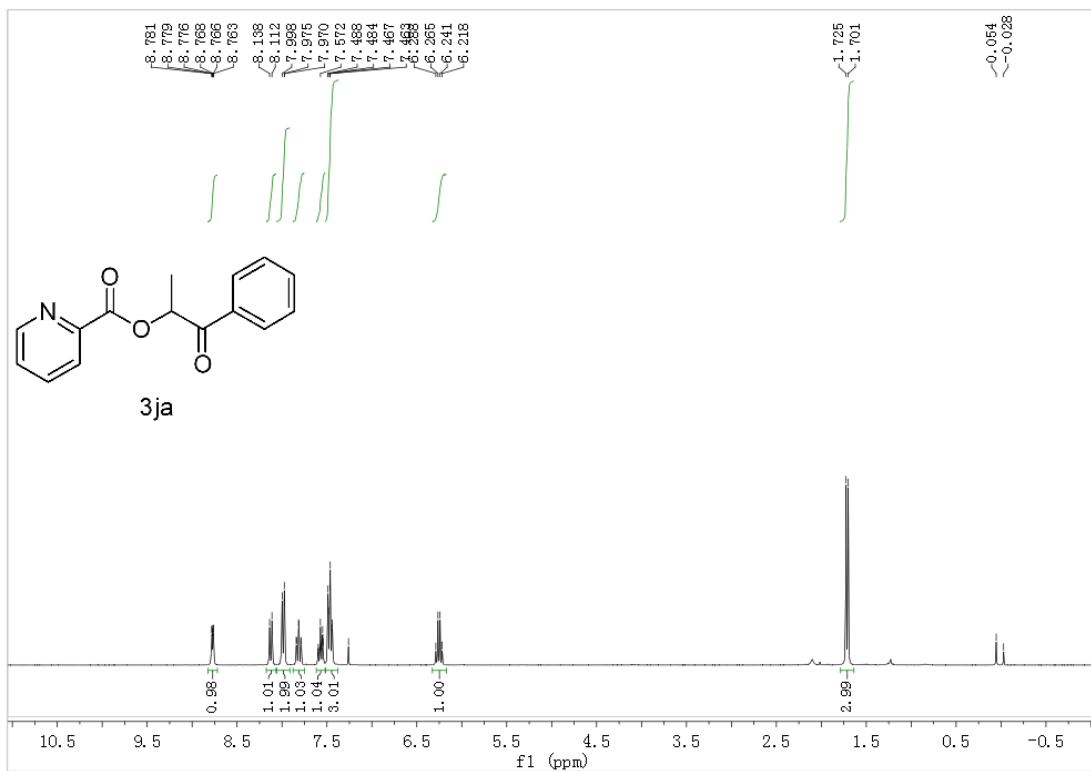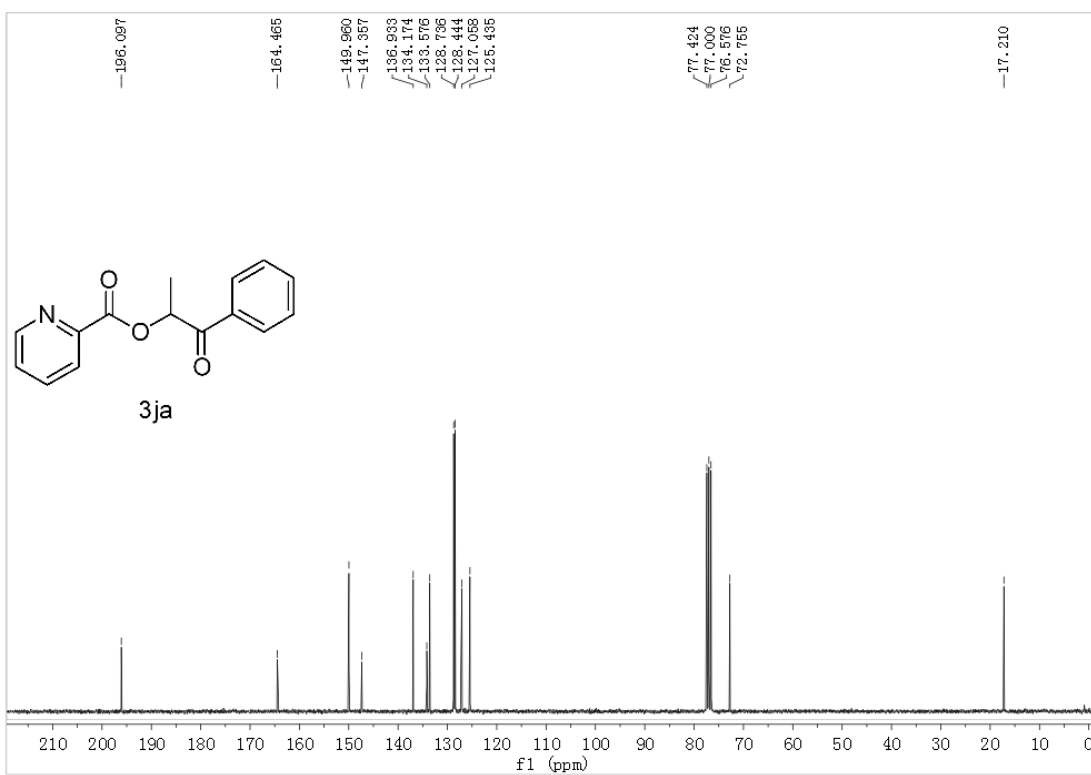



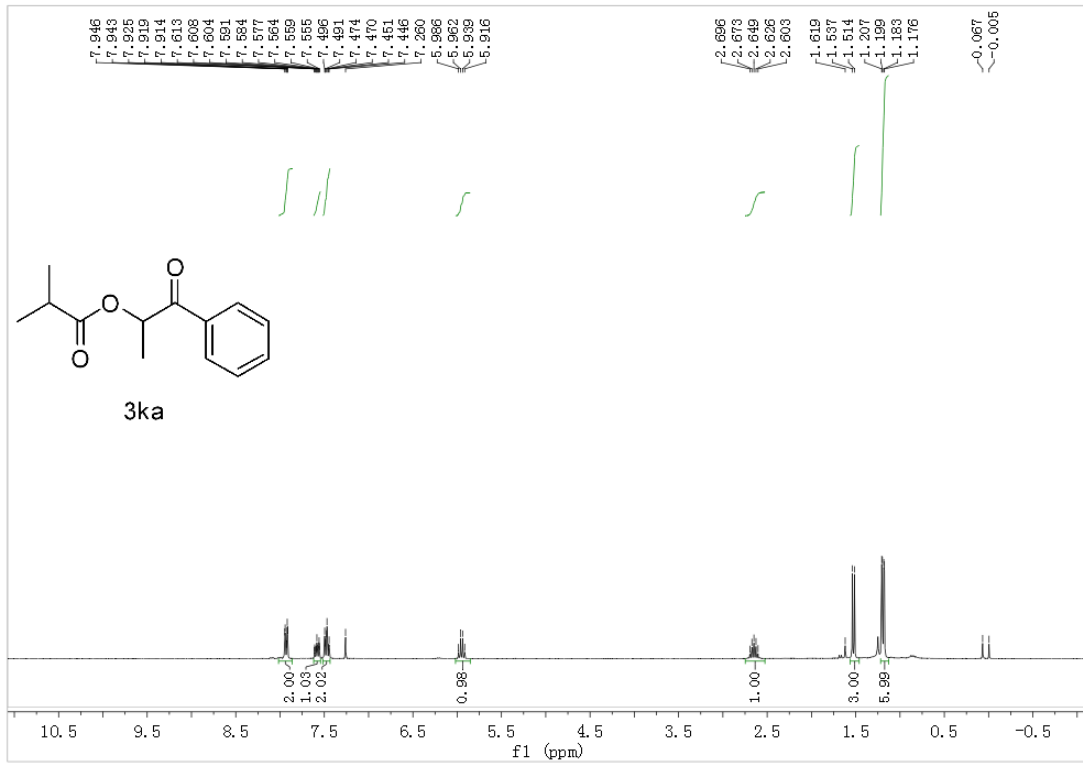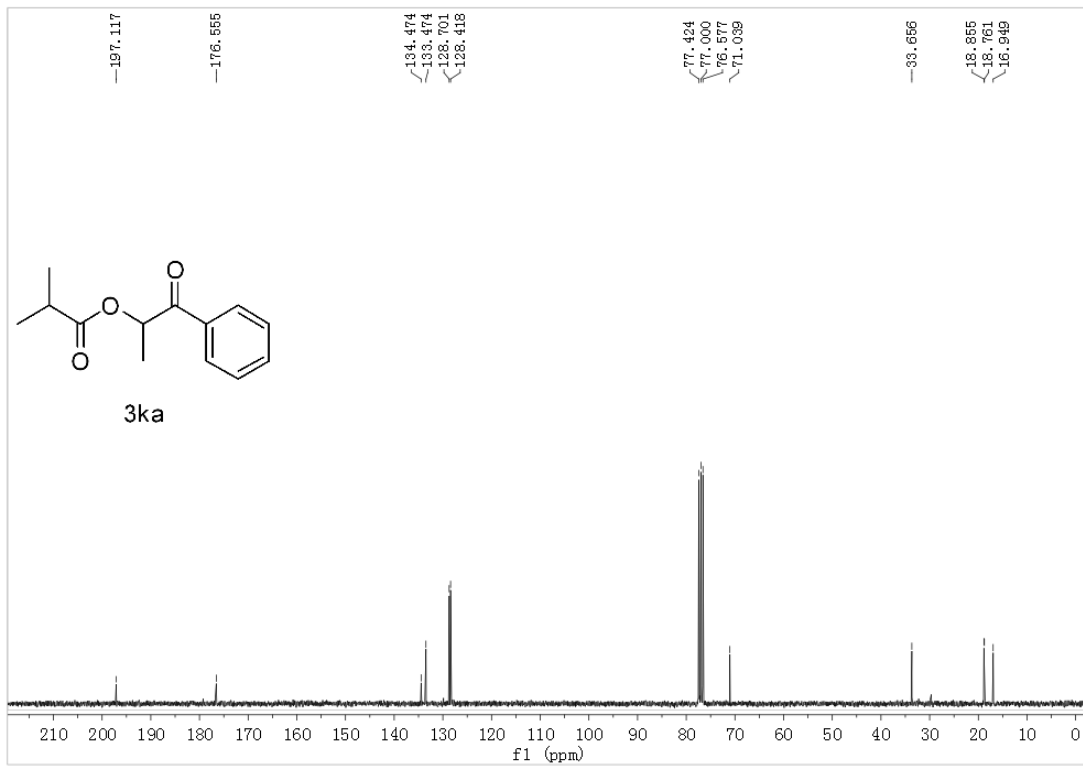

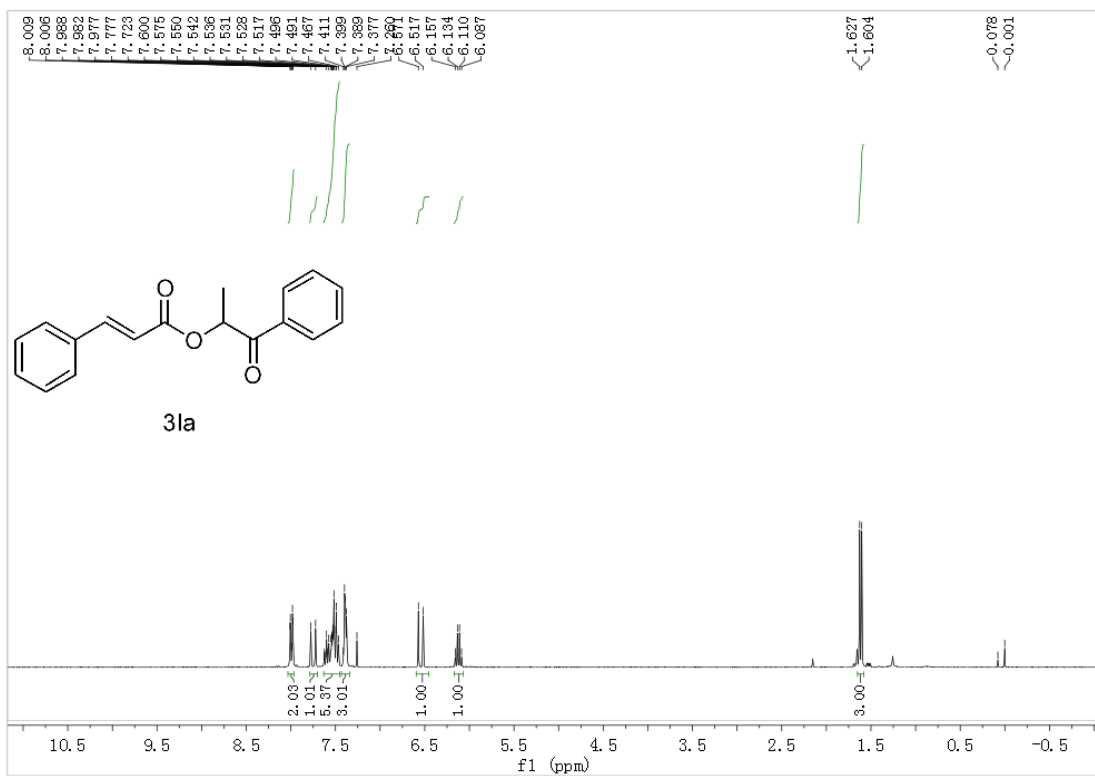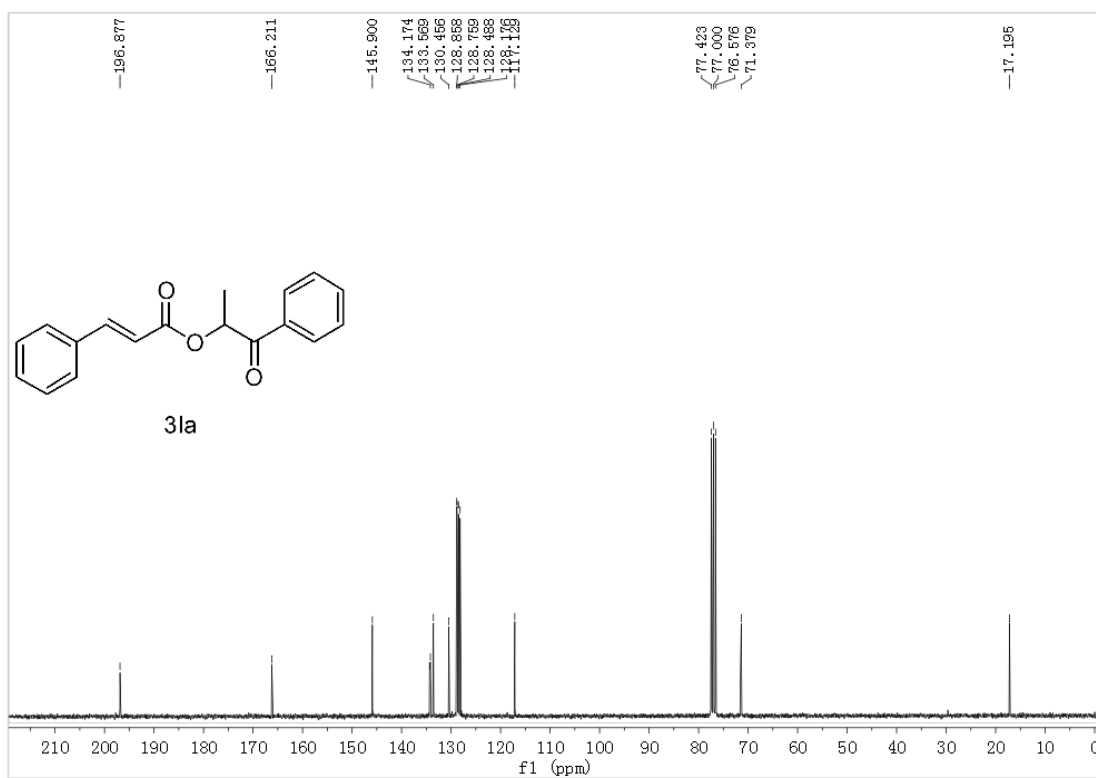

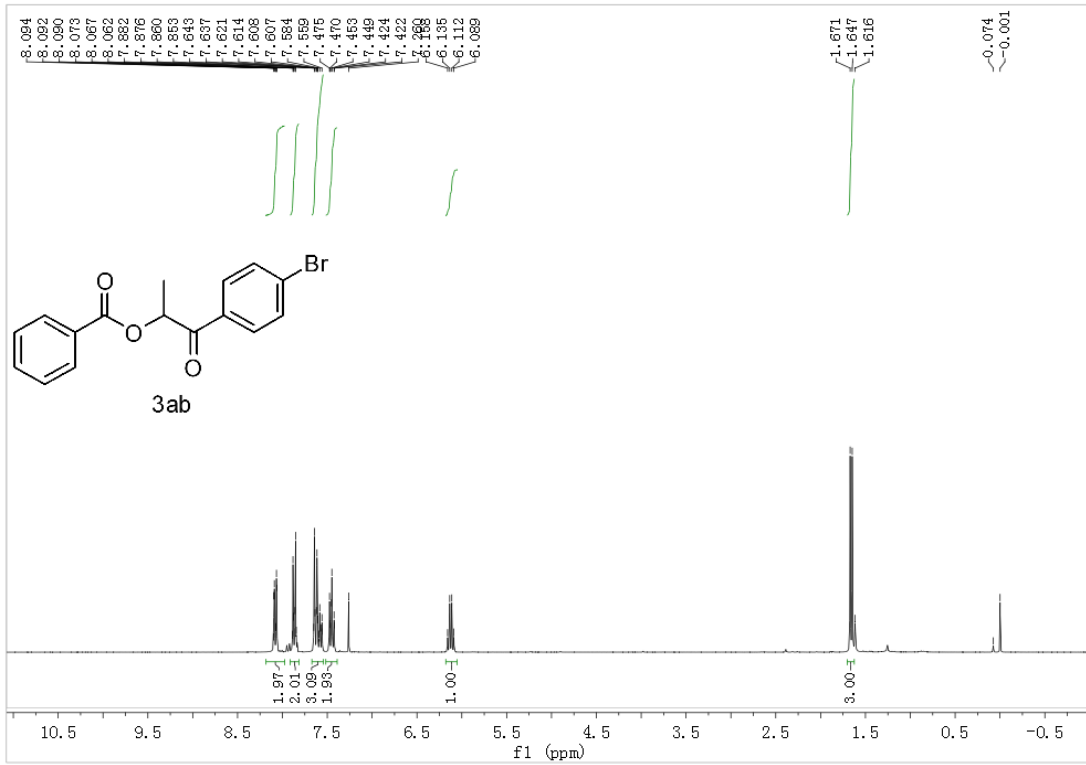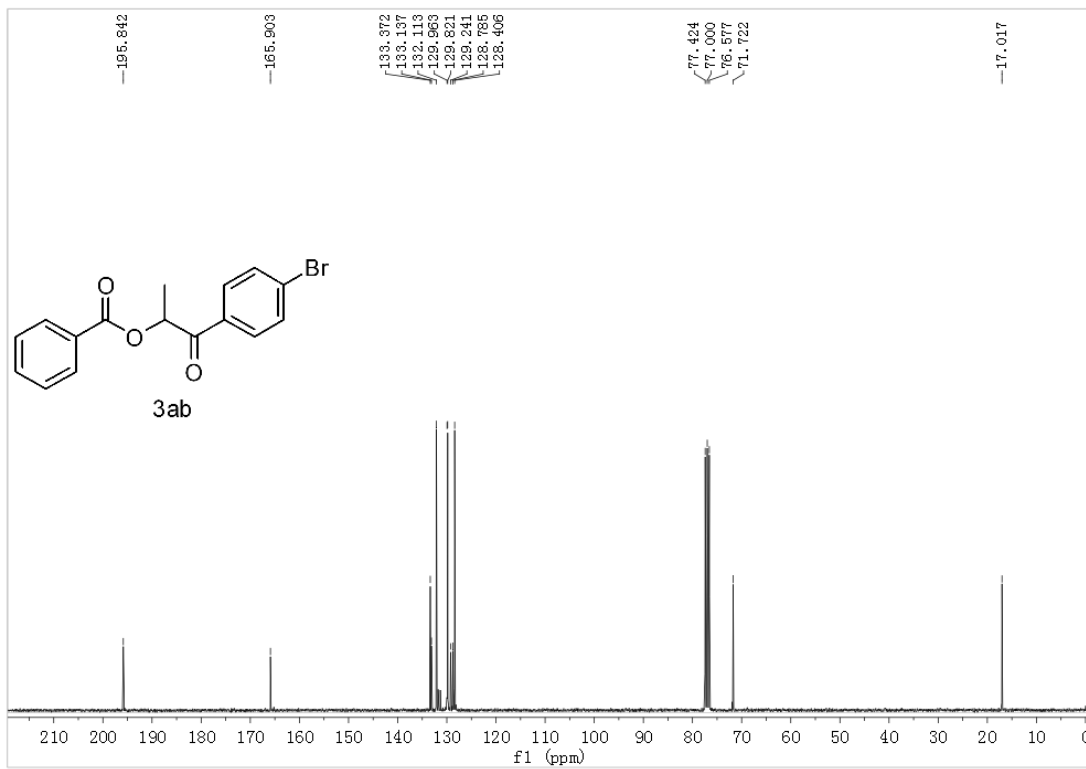

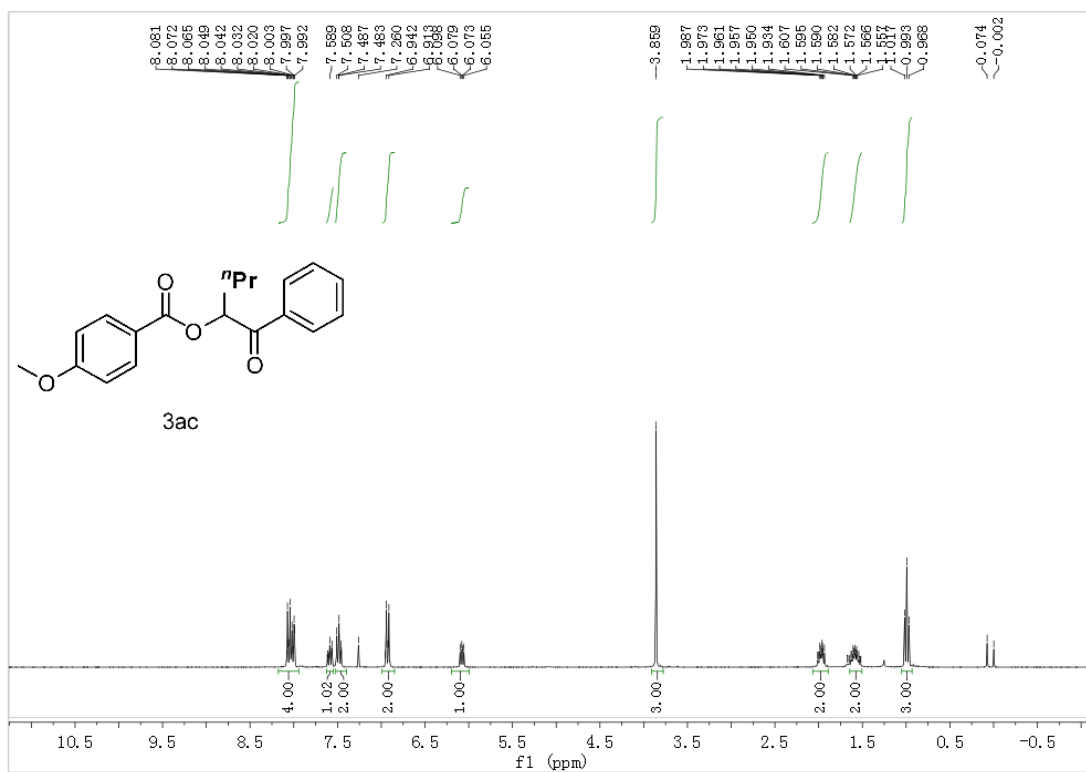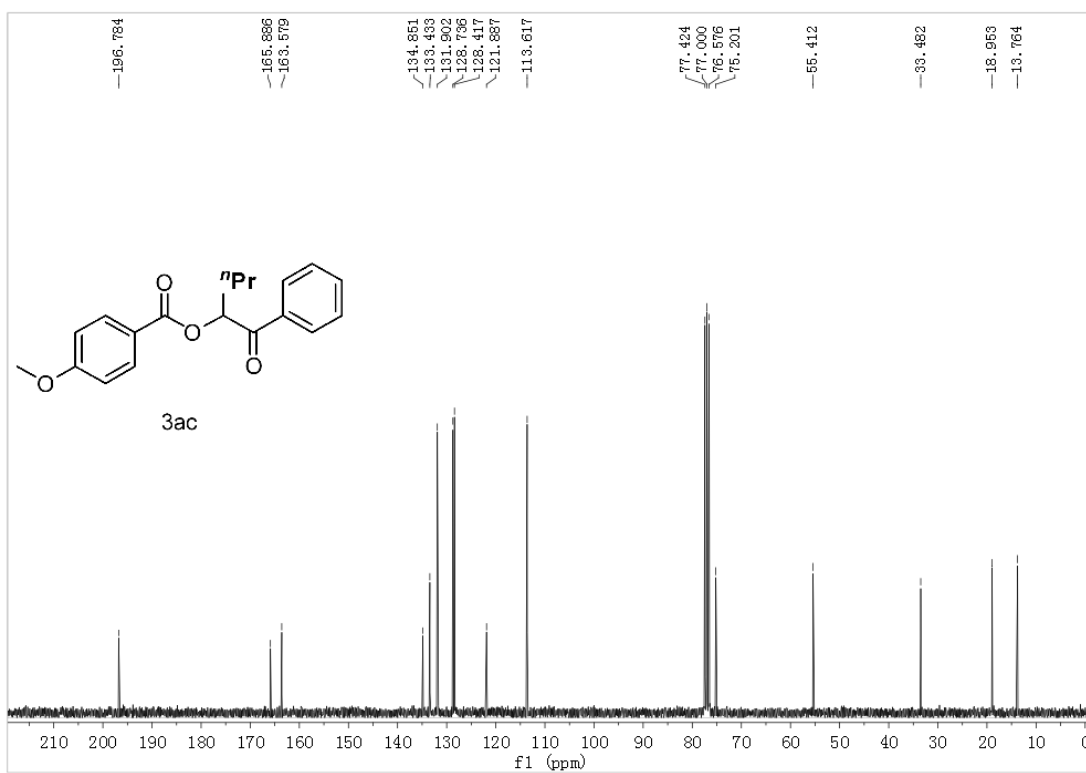

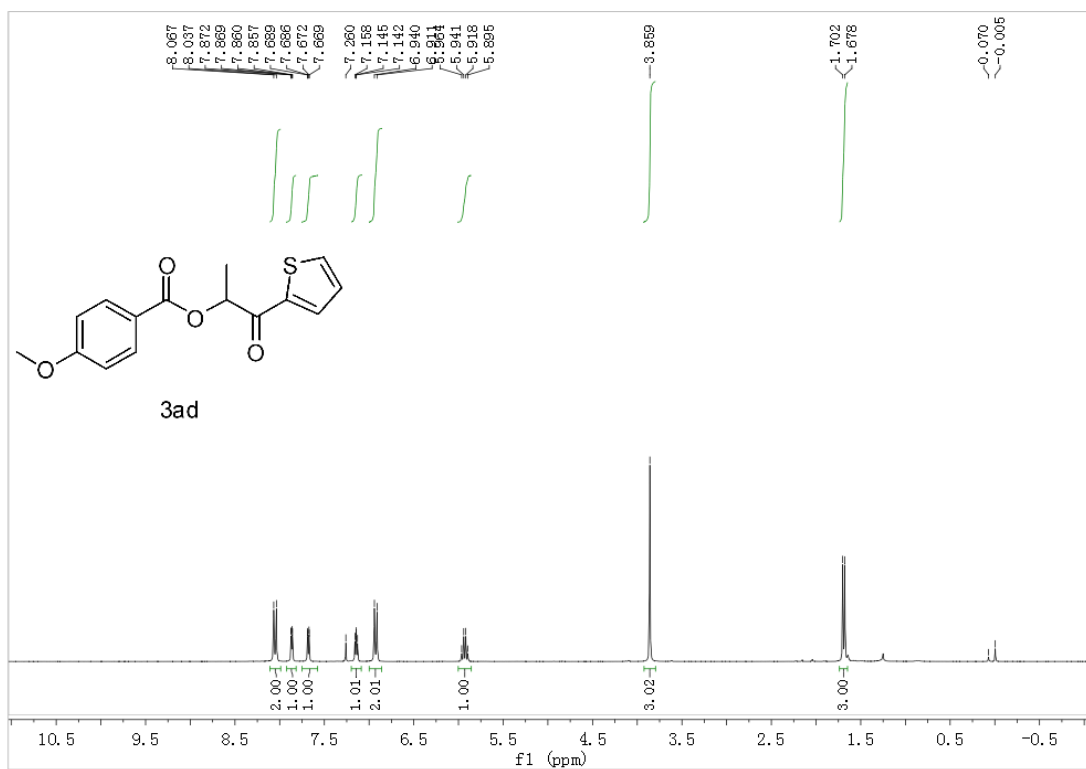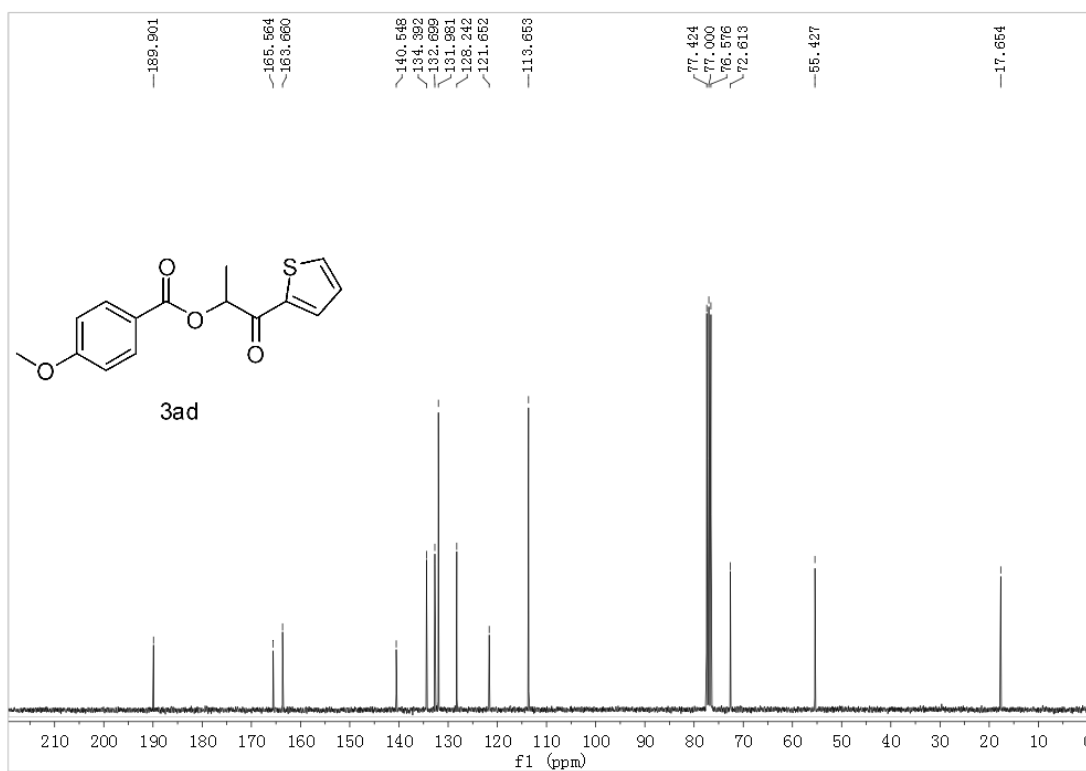

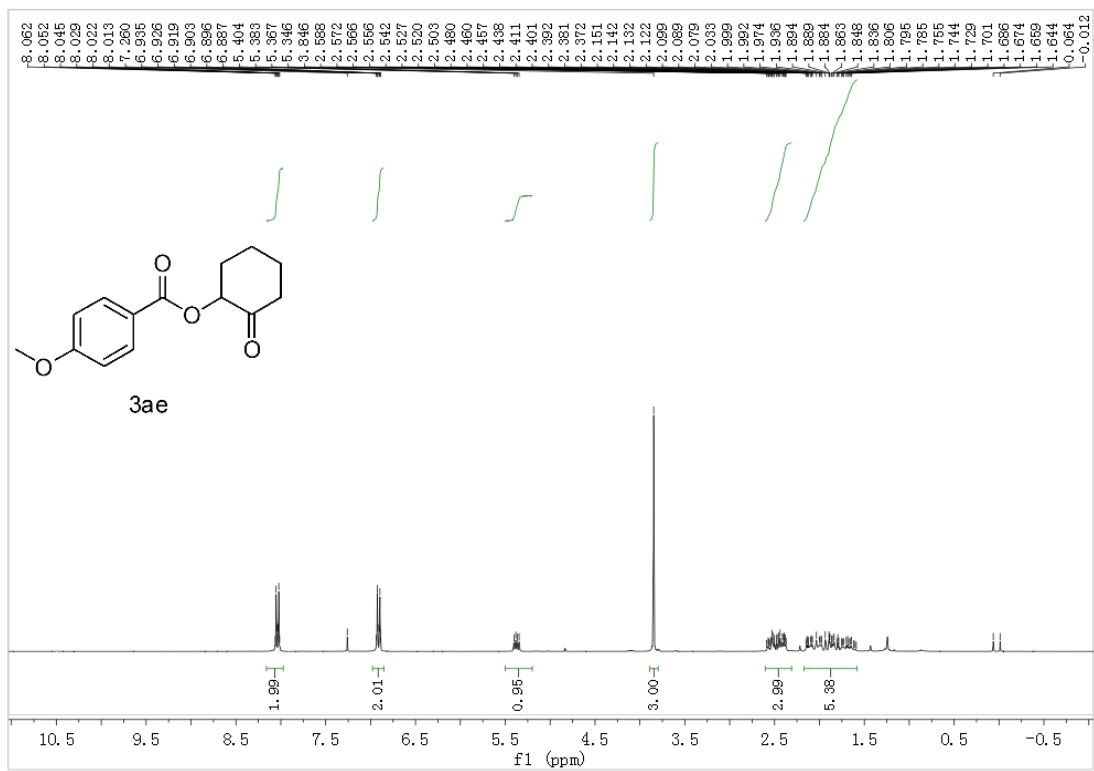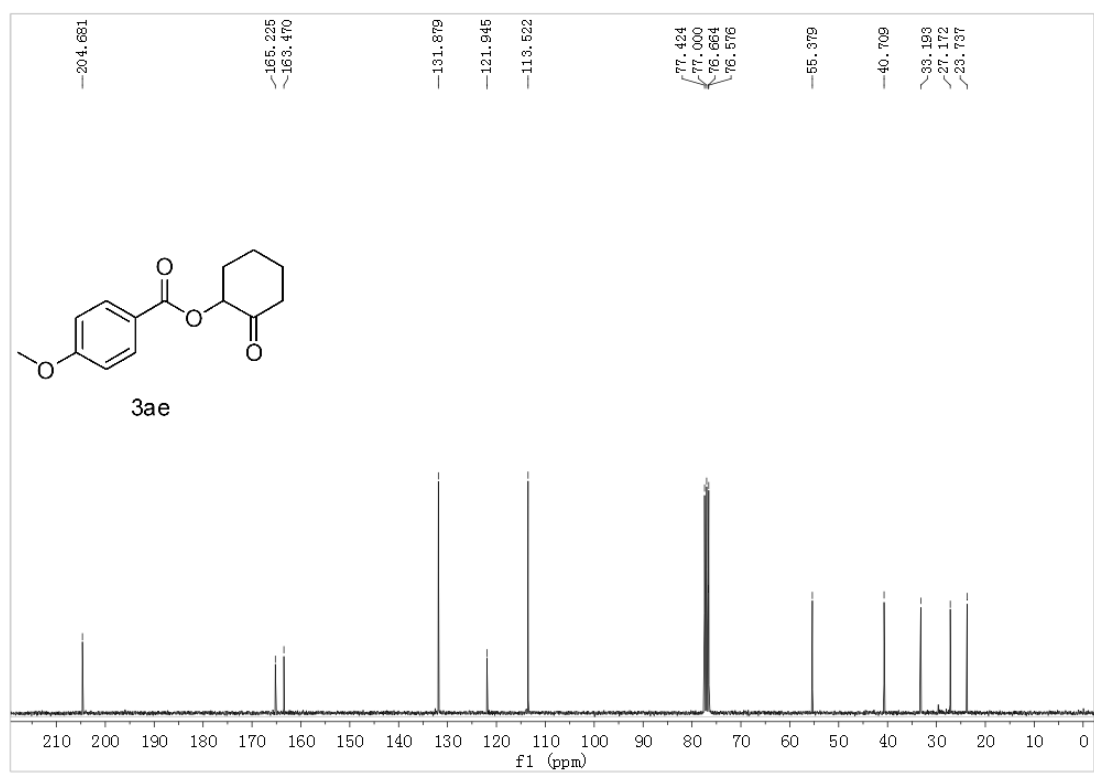

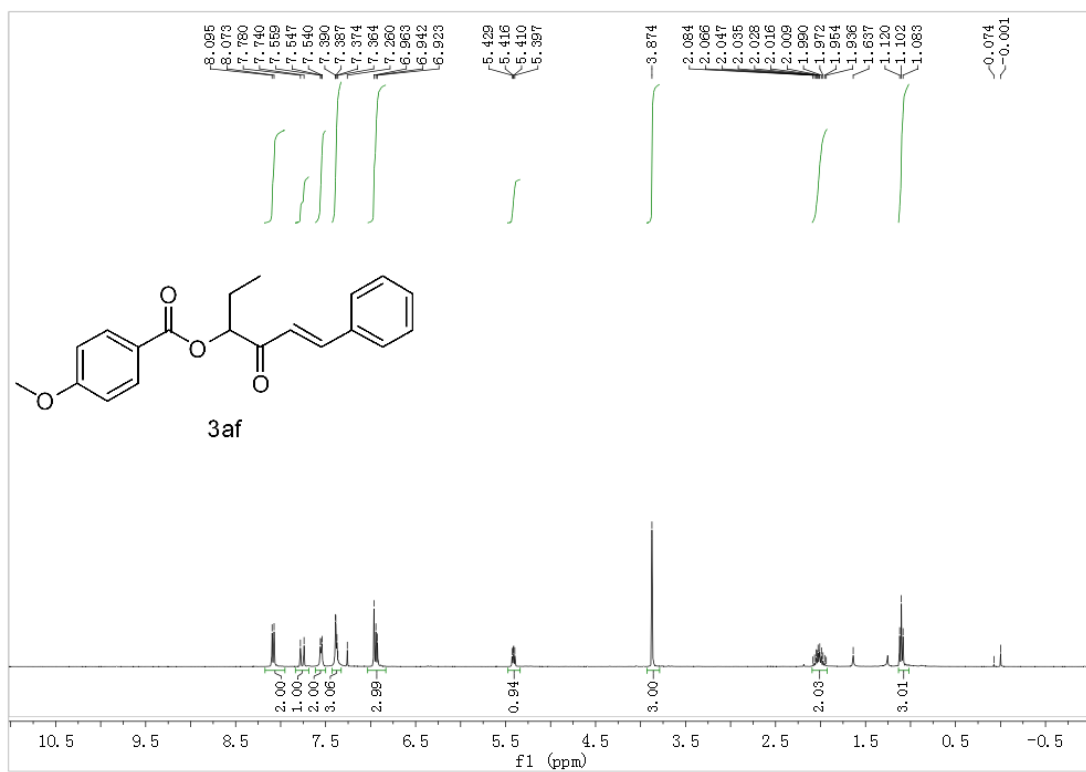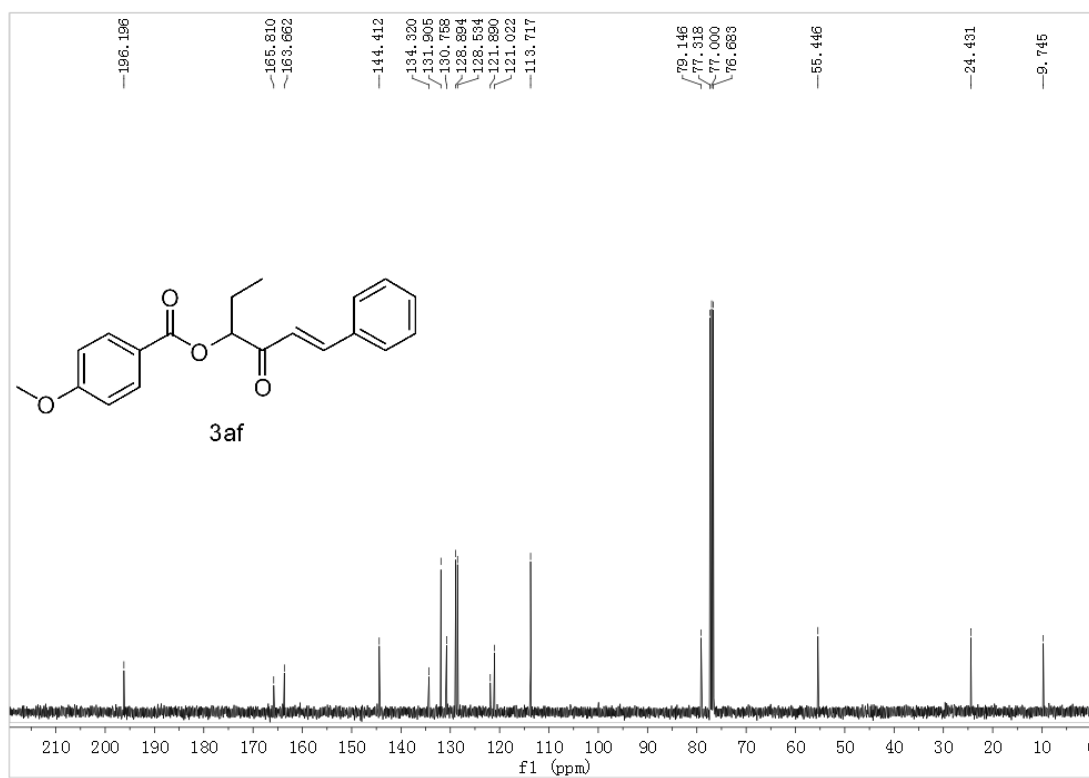

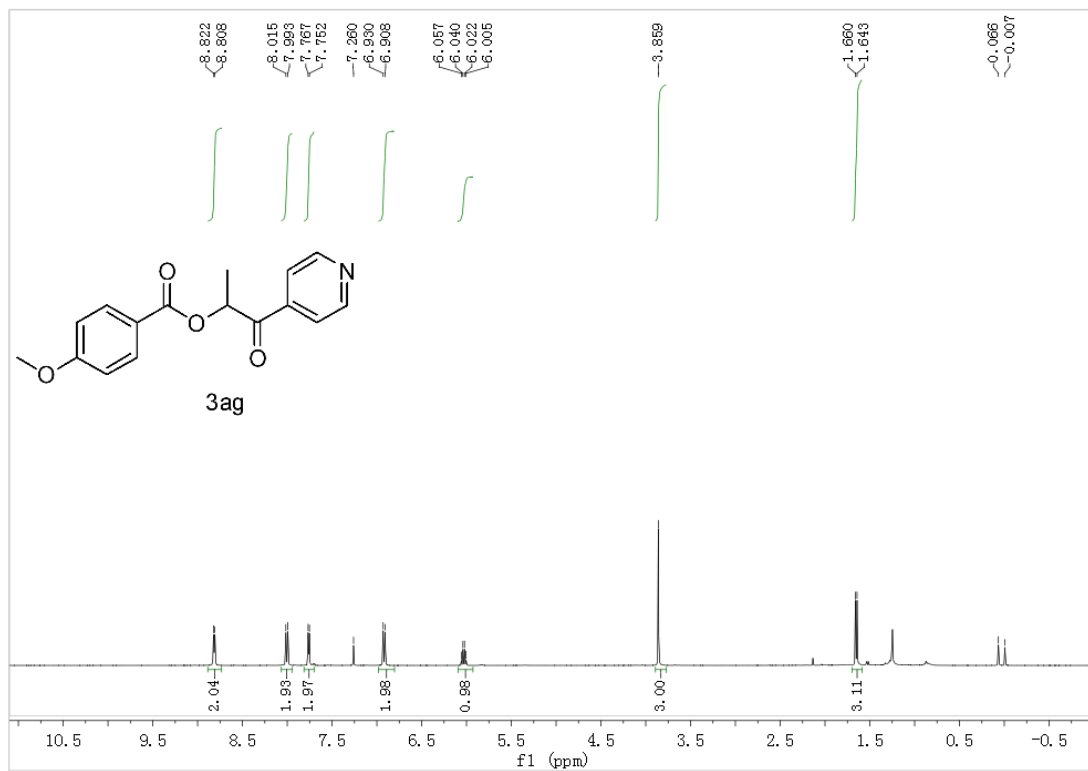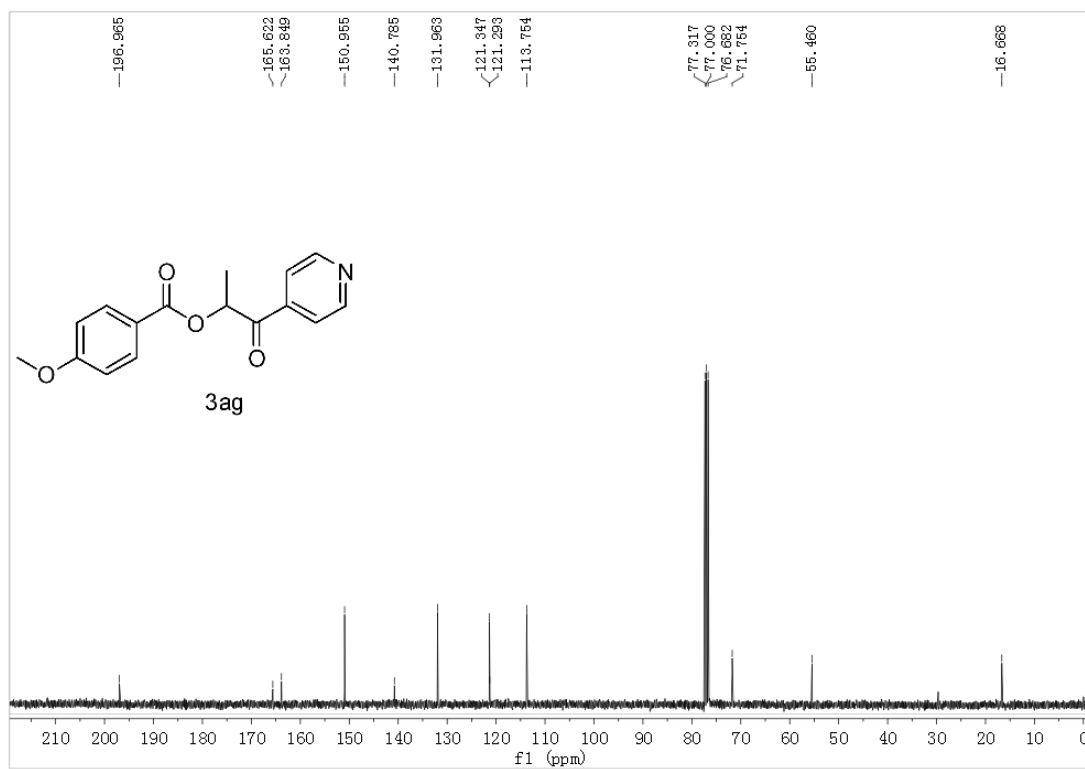

Supplement: c4cc01652a1.pdf [file c4cc01652a1.pdf]
